1 **Title**

2 Genome-wide identification of *Pseudomonas syringae* genes required for competitive  
3 fitness during colonization of the leaf surface and apoplast

4

5

6 Tyler C. Helmann<sup>a</sup>, Adam M. Deutschbauer<sup>a,b</sup>, and Steven E. Lindow<sup>a</sup>

7

8 <sup>a</sup>Department of Plant and Microbial Biology, University of California, Berkeley, CA

9 94720, and <sup>b</sup>Environmental Genomics and Systems Biology Division, Lawrence

10 Berkeley National Laboratory, Berkeley, CA 94720.

11

12 **Abstract**

13 The foliar plant pathogen *Pseudomonas syringae* can establish large epiphytic  
14 populations on leaf surfaces before infection. However, the bacterial genes that  
15 contribute to these lifestyles have not been completely defined. The fitness contributions  
16 of most genes in *P. syringae* pv. *syringae* B728a were determined by genome-wide  
17 fitness profiling with a randomly barcoded transposon mutant library that was grown on  
18 the leaf surface and in the apoplast of the susceptible plant *Phaseolus vulgaris*. Genes  
19 within the functional categories of amino acid and polysaccharide (including alginate)  
20 biosynthesis contributed most to fitness both on the leaf surface (epiphytic) or in the leaf  
21 interior (apoplast), while genes in the type III secretion system and syringomycin  
22 synthesis were primarily important in the apoplast. Numerous other genes that had not  
23 been previously associated with *in planta* growth were also required for maximum  
24 epiphytic or apoplastic fitness. Many hypothetical proteins and uncategorized  
25 glycosyltransferases were also required for maximum competitive fitness in and on  
26 leaves. For most genes, no relationship was seen between fitness *in planta* and either  
27 the magnitude of their expression *in planta* or degree of induction *in planta* compared to  
28 *in vitro* conditions measured in other studies. A lack of association of gene expression  
29 and fitness has important implications for the interpretation of transcriptional information  
30 and our broad understanding of plant-microbe interactions.

31

## 32 **Significance Statement**

33 Many plant pathogenic bacteria can extensively colonize leaf surfaces before  
34 entry and multiplication within the leaf to cause disease. While these habitats  
35 presumably require distinct adaptations, the genes required in these habitats and how  
36 they would differ was unknown. Using a genome-wide library of barcoded insertional  
37 mutants in the plant pathogen *Pseudomonas syringae*, we ascertained the common and  
38 unique genes required to colonize these habitats. A lack of association between gene  
39 expression and contribution to fitness suggests that many genes that are highly  
40 expressed or induced *in planta* are dispensable or redundant. As a model bacterium for  
41 plant pathogenesis and colonization, our comprehensive genetic dataset allows us to  
42 better understand the traits needed for association with leaves.

43

## 44 **Introduction**

45 Many plant pathogenic bacteria are capable of extensive colonization of leaf  
46 surfaces before their entry and multiplication within the leaf. As such, epiphytic (leaf  
47 surface) populations on asymptomatic plants are considered a reservoir of inoculum,  
48 that under the appropriate conditions can lead to infection. In many cases, the likelihood  
49 of disease can be predicted from the epiphytic population size of the pathogen several  
50 weeks before infection occurs (1). The ability to form large epiphytic populations  
51 therefore is a measure of success for such a pathogen, and factors that determine its  
52 ability to grow on leaves would be considered fitness factors. After entry into the  
53 apoplast, bacterial numbers often increase greatly and disease is associated with those  
54 sites in which large internal population sizes have been achieved (2). The ability to grow  
55 within the apoplast of plants is thus also a measure of its fitness. In addition to plant  
56 pathogens, a diversity of other bacteria and fungi typically colonize the surface of  
57 aboveground plant parts. Such commensal bacteria and fungi are, however, typically  
58 limited to epiphytic growth with only very small numbers of such taxa found within plant  
59 tissue as endophytes (3). It is presumed that the growth of epiphytic bacteria is  
60 supported by their consumption of a variety of carbon and nitrogen-containing  
61 compounds that transit from the interior of the plant to the leaf surface (4, 5). A variety  
62 of mono- and disaccharides are thought to constitute the majority of the carbon

63 containing compounds on leaf surfaces, with smaller amounts of other sugars, organic  
64 acids, and amino acids also present (6, 7). The absolute amount of such nutrients on  
65 leaves is generally low, and the growth of epiphytic bacteria is typically carbon-limited  
66 (6). Furthermore, the abundance of such nutrient sources on plants is spatially  
67 heterogeneous (4, 6). Because of the apparent chemical complexity, and spatially  
68 heterogeneous chemical and physical features of leaves, those traits needed for  
69 epiphytic fitness remain largely uncharacterized (8). Only limited descriptions of the  
70 chemical and physical environment found within the apoplast of plants have appeared  
71 (9). While many of the nutrient resources on the surface are apparently also present in  
72 the apoplast, the chemical and physical environment there is largely unknown. Water  
73 availability apparently limits intercellular growth (10), and the ability of pathogens to  
74 induce plants to release water into the apoplast may be a major feature required for  
75 exploitation of this habitat (11, 12). While the apoplast provides bacterial cells protection  
76 from environmental stresses on the leaf surface, they are in intimate proximity to living  
77 plant cells, and thus subject to inhibitory responses by the plant mediated by the innate  
78 immune system (3, 7). Taken together, it is clear that a large repertoire of traits beyond  
79 resource acquisition, such as motility, habitat modification, and various interactions with  
80 the plant may be needed by a plant pathogenic bacterium to exploit both the leaf  
81 surface and the leaf interior. Unfortunately, very few such fitness traits beyond those  
82 associated with interactions with the plant immune system have been identified.

83 *Pseudomonas syringae* is a plant pathogenic bacterial species that includes  
84 strains pathogenic on a wide variety of different plant species (13). Most strains have a  
85 prominent epiphytic phase, especially on the plant species for which they can also  
86 cause infection. Strains of *P. syringae* are commonly found as epiphytes on a variety of  
87 both host-and non-host plants, both in agricultural systems as well as native plant  
88 communities (14, 15). Many strains are capable of catalyzing ice formation, and  
89 because they can be found in rainfall, pristine snow, as well as in water sources around  
90 the world, are thought to play an important role in the water cycle by initiating ice  
91 formation central to the precipitation process (15). Such a connection to precipitation  
92 may also serve as a vehicle for long-distance dispersal as well as a mechanism for  
93 migration to plants after dispersal (16).

94           The model strain *P. syringae* pv. *syringae* B728a (B728a) is a strong epiphytic  
95 colonizer that was originally isolated from green bean (*Phaseolus vulgaris*), and is  
96 capable of causing brown spot disease (17). It is the best-studied member within *P.*  
97 *syringae* phylogroup II. This monophyletic clade contains strains that are  
98 overrepresented in environmental samples and are generally better epiphytes than  
99 members of other clades (18, 19). In addition, phylogroup II contains many strains with  
100 broad host ranges (19). Strain B728a is also pathogenic on *Nicotiana benthamiana* (20)  
101 and pepper (*Capsicum annuum*) (21). Like other ice nucleation active strains of *P.*  
102 *syringae*, this strain contributes to frost damage in frost sensitive plant species by  
103 limiting their ability to supercool and avoid damaging ice formation (22). Strain B728a is  
104 also a model for phytotoxin production, and contains a much smaller type III effector  
105 repertoire than many other strains such as *P. syringae* pv. *tomato* strain DC3000 (23,  
106 24). As such, it has been hypothesized that this lower type III effector repertoire belies  
107 an increased reliance on broad-spectrum toxins as well as ice nucleation ability that  
108 contributes to its broad host range and more general environmental distribution (25).  
109 This robust epiphytic colonizer and ubiquitous plant pathogen is thus a useful model to  
110 examine traits needed for bacterial success in diverse environments.

111           The genes that are putatively the most ecologically relevant to the success of  
112 bacteria on plants have typically been identified on the basis of their transcriptional  
113 induction or expression in a given habitat (26). Measurements of gene expression,  
114 directly via microarray or RNAseq, or indirectly through reporter genes or *in vivo*  
115 expression technology (IVET), have been used in *Pseudomonas syringae* to identify  
116 genes that have host-responsive expression patterns (27–31). Validation of the role of  
117 genes identified by this method however usually involves targeted disruption of such  
118 genes individually with subsequent assessment of changes in behavior. This is a  
119 laborious procedure that cannot be readily applied to the genome as a whole. The high  
120 variability of the population size of a given strain after inoculation makes the comparison  
121 of population sizes between mutants and parental strains difficult. Large numbers of  
122 replicate samples are required to distinguish differential growth of such strains unless  
123 they differ greatly (32). Moreover, transcriptional studies may be of limited use in  
124 identifying host-colonization genes due to the lack of correlation between gene

125 expression and contribution of those genes to fitness that is often observed *in vitro* (33).  
126 Examples of such a lack of correspondence of gene expression and fitness contribution  
127 in some *Pseudomonas* species on hosts have appeared (34, 35) but it is unclear how  
128 prevalent such a lack of connection might be.

129 To ascertain the roles of individual genes in *P. syringae* during epiphytic and  
130 apoplastic colonization on a genome-wide scale, we utilized a highly parallel  
131 transposon-based genomic screen. A variety of techniques taking advantage of high-  
132 throughput sequencing have been used to identify genes contributing to host  
133 colonization (36, 37). For example, genomic comparisons can reveal differential gene  
134 abundance in strains and genes that are under putative positive selection, suggesting  
135 that they might be contributing to host-specific fitness (38–40). However, confirmation of  
136 the role of such genes typically requires laborious mutation analysis as discussed  
137 above. Random mutagenesis techniques can enable genome-wide, gene-specific  
138 fitness contributions to be measured in a given habitat. One such strategy employs  
139 transposon sequencing (TnSeq) wherein the relative proportion of a transposon mutant  
140 in a given gene within a mixture of such mutants is assessed both before and after the  
141 strain mixture experiences a given condition. The number and genome location of the  
142 mutants in the mixture is determined by determining the sequences adjacent to the  
143 transposon by high throughput sequencing in each experiment (41). Recently  
144 developed random-barcoded transposon sequencing (RB-TnSeq) (42) is a modification  
145 of TnSeq that enables a transposon library to be used more easily for multiple assays  
146 since tagged transposons are used in mutagenesis and need be mapped only once.  
147 Eliminating the need to re-map transposon insertions in each experiment dramatically  
148 reduces the effort to carry out fitness screens in multiple conditions by using a single  
149 library of mutants. In a transposon mutant pool where each transposon is linked to a  
150 unique 20-nucleotide barcode, insertion mutant fitness is calculated through amplicon  
151 sequencing of the barcode regions to calculate the relative abundance of a given strain.  
152 Change in barcode relative abundance over time is used as a proxy for strain fitness  
153 within the population. RB-TnSeq was recently used to identify genes required by *P.*  
154 *simiae* for its invasion of *Arabidopsis thaliana* roots (43). In this study, we used RB-  
155 TnSeq to identify genes in *P. syringae* needed for its colonization of both the surface

156 and interior habitats of bean. Since the stimulon for these two habitats had previously  
157 been determined (15), we also addressed the extent to which transcriptional changes in  
158 gene expression were predictive of the fitness contributions of these same genes.

159

## 160 **Results**

### 161 **Adapting RB-TnSeq for an epiphyte and foliar pathogen**

162 In order to screen for genes in *P. syringae* strain B728a contributing to host  
163 colonization, we generated a randomly DNA barcoded *mariner* transposon library using  
164 the *Escherichia coli* donor library created by Wetmore *et al* (42). The sequenced B728a  
165 mutant library consisted of 281,417 strains with insertions that map to the B728a  
166 genome, each containing a unique DNA barcode. Computationally removing insertional  
167 mutants outside the central 10 – 90% of coding region of a given gene resulted in  
168 169,826 genic strains for analysis, with a median of 21 insertions per gene. The number  
169 of usable insertional mutants for each gene was correlated with the number of TA  
170 dinucleotide sites within each coding region (Pearson correlation coefficient  $r = 0.72$ )  
171 (Fig. S1). We analyzed fitness contributions for 4,296 of 5,137 (84%) protein-coding  
172 genes that harbored sufficient insertions for analysis.

173 The rich medium King's B (KB) was used for library recovery prior to plant  
174 inoculations, so overnight growth in this condition was used as the control against which  
175 growth of the mutants on the leaf surface and in the apoplast (Fig. 1) was compared. All  
176 experiments analyzed herein passed quality control metrics that were previously  
177 established for *in vitro* studies in (42). The requirements for a successful experiment  
178 include  $\geq 50$  median reads per gene and consistency in the calculated fitness estimate  
179 obtained from mutants with insertions in the 3' and 5' half of a gene (42).

180 For each experiment, an aliquot of the mutant library was grown to mid-log phase  
181 in KB (ca. 5 generations) and a sample of the library was taken immediately before  
182 inoculating either the surface or interior of plants (time0). After growth in each condition,  
183 cells were recovered from either the surface or interior of the plants and prepared for  
184 sequencing. Fitness for each strain was calculated as the  $\log_2$  of the ratio of barcode  
185 abundance following growth in or on plants with that barcode abundance obtained  
186 initially at time0. Gene fitness is calculated as the weighted average of the individual

187 strain fitness scores (42). Insertions in the majority of genes did not change fitness as  
188 measured by relative barcode abundance in the population, and thus the fitness scores  
189 for most genes were close to 0.

190

### 191 **Identification of the essential gene set of B728a**

192 Of the 920 genes for which fitness could not be calculated due to a lack of  
193 sufficient insertional mutants, only 7 do not contain TA dinucleotide sites and thus are  
194 not accessible by mutagenesis with the *mariner* transposon we used. 512 of these  
195 genes did contain at least one mapped insertion, but we were unable to calculate fitness  
196 scores for them due to the small number of sequencing reads at time0 (Fig. S2),  
197 suggesting that they were relatively unfit *in vitro* compared to other mutants, and thus in  
198 low relative population size in the library. Based on analysis of the TnSeq data, we  
199 predicted 392 genes to be essential for B728a growth on LB, as they contain numerous  
200 TA sites but do not contain any mapped insertion strains in our library. The 392  
201 predicted essential genes include many annotated as being involved in translation  
202 (including tRNAs), energy generation, and cofactor metabolism (Table S1). We  
203 identified homologs in *P. aeruginosa* PAO1 for 363 of the 392 predicted essential B728a  
204 genes (Table S2). Of these, 259 are predicted to be essential and 104 are predicted to  
205 be nonessential in that strain (44).

206

### 207 **Disruption mutants with fitness defects in rich media**

208 We identified 20 genes that were required for maximal growth in KB media, 9 of  
209 which are involved in cofactor metabolism (Table S3). Thirteen of these 20 genes  
210 contribute to fitness in or on plants (Fig. 3). This suggests that cofactors such as biotin  
211 are lacking in KB media, as well as in the *in planta* habitats.

212

### 213 **Maintaining genetic diversity of the transposon library *in planta***

214 A major challenge for the use of complex mixtures to study the relative fitness of  
215 component strains in any experiment, especially studies done *in planta*, is to ensure that  
216 all of the mutants in the mixture are well represented after inoculation so as to avoid  
217 bottleneck effects. The strength of saturated transposon mutagenesis methods lies in

218 internal replication: the contribution of each gene is assessed by interrogation of the  
219 behavior of multiple independent insertional mutant strains. A loss of diversity at the  
220 time of inoculation reduces the statistical power for analysis of a given gene. We aimed  
221 to maximize the total number of inoculated bacterial cells to maintain population  
222 diversity, while achieving a sufficiently low initial inoculum in or on plants so that  
223 substantial, competitive growth of the mixture could be assured. Although we observed  
224 slight bottlenecks given the concentration of inoculated cells we used, particularly in  
225 apoplastic conditions, these samples provided sufficient reads for most mutants to  
226 enable analysis of the fitness contribution of nearly all genes (Table S4); more than 80%  
227 and 68% of the unique barcoded mutants were retained in studies of epiphytic and  
228 apoplastic growth, respectively. More than 99% of the unique barcoded mutants in the  
229 library were retained during *in vitro* experiments.

230 During the growth of strain B728a on leaf surfaces for 2 days the total number of  
231 cells increased approximately 100-fold (27), corresponding to 6 to 7 population  
232 doublings. Similarly, during growth in the apoplast for 6 days population size increased  
233 about 1000-fold (Fig. S3), indicating at least 10 cell divisions. In theory, in an  
234 experiment on leaves in which most strains exhibited 6 generations of growth, mutants  
235 completely incapable of growth should exhibit a fitness of about -6 (42). In practice,  
236 insertions in very few genes exhibited such an extreme lack of fitness (Fig. 2). However  
237 80 genes in which mutants exhibited fitness scores  $< -2$  (exhibiting only 25% as much  
238 growth in the population relative to that of the typical strain in the mutant population)  
239 contributed strongly to growth in a given condition (Fig. 3a). Mutants in an additional 69  
240 genes exhibited fitness scores less than -1 but greater than -2 (Fig. 3b) suggesting that  
241 these genes contributed somewhat less to fitness (42). We did not normalize fitness  
242 scores by the average number of generations in a given experiment, as these values  
243 are difficult to estimate and likely vary by plant within an experiment.

244 Despite the differences in the number of generations in epiphytic versus  
245 apoplastic growth in plants (27), we observed similar ranges in overall fitness scores for  
246 individual genes in these two habitats (Fig. 2). Mean fitness scores ranged from -4.6 to  
247 +1.7 (epiphytic) and -6.0 to +1.8 (apoplastic). For each gene, we averaged fitness  
248 values for the 2 replicate growth experiments in KB and the 3 epiphytic and 3 apoplastic



249 experiments performed. We focused our analysis on genes contributing most strongly to  
250 fitness - those having an average fitness  $< -2$  and for which the  $t$ -score was  $< -3$  in at  
251 least two replicate experiments. Since the plant host constitutes a more variable  
252 environment than most *in vitro* experiments, and expecting that many genes would not  
253 individually make large contributions to fitness, we also examined genes with fitness  
254 scores  $< -1$  but with  $t < -3$ . Special attention was placed on those genes with such  
255 scores that are operative in a given metabolic pathway or could be placed in the same  
256 functional category. Approximately 50% of all genes exhibiting fitness scores less than -  
257 2 or -1 in either epiphytic or apoplastic habitats were verified in at least two of three  
258 replicate experiments (Fig. S4).

259

### 260 **Genes required specifically for colonization of the leaf surface**

261 We identified 31 genes that were highly important for fitness on the leaf surface  
262 (Table S5), although only 8 were not also important in the apoplast. Among these 8,  
263 genes in the predicted operon *Psyr\_2461-2* had a particularly strong epiphytic  
264 phenotype, with average fitness scores of -2.1 and -3.2. *Psyr\_2461* is a hypothetical  
265 protein containing a domain of unknown function (DUF934) and *Psyr\_2462* is  
266 homologous to the sulfite reductase *cysI* in *P. aeruginosa*. Glutamate synthase  
267 (NADPH) subunit genes *gltB* (*Psyr\_0411*) and *gltD* (*Psyr\_0412*) also contributed  
268 strongly to epiphytic growth, having average fitness scores of -2.0 and -1.1. Disruption  
269 of the putative phage-related protein *Psyr\_4512* also strongly reduced epiphytic fitness  
270 (average fitness score = -2.1).

271

### 272 **Genes contributing specifically to colonization of the leaf apoplast**

273 Disruption of many genes encoding known virulence factors, including those in  
274 the type III secretion system (T3SS) (Fig. S5) and phytotoxin biosynthesis genes greatly  
275 reduced the growth of *P. syringae* in the apoplast. Of the 65 genes that were highly  
276 important (average fitness  $< -2$ ) for apoplastic colonization (Table S6), 36 were  
277 important in this habitat but not on leaf surfaces. The T3SS genes we observed as  
278 essential for successful apoplastic colonization are exclusively involved in the T3SS  
279 machinery, as transposon insertions in most individual effector genes generally had no

280 fitness phenotype (Fig. 4a). Of the secreted type III effectors, *hopAB1* had the largest  
281 negative average fitness value (-0.55). While the fitness contribution of this gene was  
282 less than many others, growth of mutants in this gene was decreased in all three  
283 experimental replicates (standard deviation = 0.065,  $t < -3.5$  for all). As  $t$ -values are  
284 positively correlated with measures of fitness, the low variance in fitness seen among  
285 the 21 insertional mutants for this gene provide confidence in the rather modest fitness  
286 estimates for this gene.

287 Production and secretion of the phytotoxin syringomycin was required for  
288 competitive fitness in the apoplast. The syringomycin regulator *syrP* and syringomycin  
289 efflux transporter *syrD* both had large apoplastic-specific phenotypes when disrupted. In  
290 contrast, syringopeptin and syringolin mutants did not have significant apoplastic fitness  
291 defects in our experiments. Polysaccharide synthesis and regulation was highly  
292 important for competitive fitness in the apoplast. Mutants in alginate regulation (*algU*)  
293 and biosynthesis were dramatically less competitive than the typical mutant in the  
294 library. Group 1 glycosyltransferase encoding genes (*Psyr\_0920* and *wbpYZ*) also  
295 contributed substantially to apoplastic growth (Fig. 4b).

296 The two-component system GacA/GacS was moderately important in the  
297 apoplast (average fitness = -0.9 and -1.5), but interestingly, their disruption resulted in  
298 increased fitness on the leaf surface (average fitness = 1.3 and 1.7). Conversely,  
299 glutathione synthase (*gshB*) was important in KB (average fitness = -1.5) and on the  
300 leaf surface (-1.2), but disruption of this gene increased competitive fitness in the  
301 apoplast (+1.8). Generally, however, insertional mutations rarely significantly increased  
302 fitness in any experiment.

303

#### 304 **Genes required for the colonization of both the leaf surface and apoplast**

305 Overall, the categories of “amino acid metabolism and transport”,  
306 “polysaccharide synthesis and regulation”, and “nucleotide metabolism and transport”  
307 were enriched in genes with average fitness less than -2 in both epiphytic and  
308 apoplastic habitats relative to that in rich media (Table S7). We identified 31 genes that  
309 were highly important for epiphytic colonization, and 65 genes that contributed to

310 apoplastic growth. Approximately 1/3 of all genes contributing to leaf colonization were  
311 also important in the apoplast (Fig. 3).

312 Genes required for the biosynthesis of several different amino acids were highly  
313 important in colonization of both the leaf surface and the apoplastic space. Genes  
314 required for biosynthesis of tryptophan, proline, and the shared biosynthetic pathway of  
315 isoleucine/leucine/valine were among those with the largest contributions to fitness in  
316 both *in planta* conditions tested. Additionally, genes involved in biosynthesis of  
317 methionine were important for epiphytic survival, as seen previously (45), and disruption  
318 of these genes caused even greater decreases in apoplastic growth suggesting that  
319 these resources are in low abundance in these habitats. For example, average fitness  
320 scores for *metW* and *metZ* auxotrophs were < -4 in the apoplast, but approximately -0.8  
321 on leaf surfaces. A similar, albeit less dramatic, pattern of proportionally larger  
322 requirements for histidine biosynthesis under apoplastic growth was also seen. The  
323 production of cofactors such as pantothenate (vitamin B<sub>5</sub>) requiring *panC* was important  
324 in both *in planta* conditions but contributed more to the growth on the leaf surface.  
325 Genes involved in nucleotide biosynthesis (*purFL*) were also highly important for growth  
326 both in and on leaves.

327 The genes *mdoGH* encoding glucan synthesis were required for optimal growth  
328 on both the leaf surface and in the apoplast. Hypothetical proteins encoded by  
329 *Psyr\_0532*, *Psyr\_2461*, and *Psyr\_4158 (eftA)* all made significant contributions to  
330 fitness both epiphytically and in the apoplast. *Psyr\_0532* contains a group 1  
331 glycosyltransferase domain.

332

### 333 **Validation of fitness estimated in disruption mutant mixtures with targeted** 334 **deletion strains**

335 To determine whether the growth deficiencies of mutant strains in the pooled  
336 assays were predictive of that when grown in isolation, we constructed targeted deletion  
337 mutants of several genes that contributed differentially to apoplastic fitness of *P.*  
338 *syringae*. Amino acid auxotrophs  $\Delta trpA$  (average apoplastic fitness = -2.7) and  $\Delta hisD$   
339 (average fitness = -3.0) inoculated individually into the apoplast. While  $\Delta trpA$  was almost  
340 incapable of growth, the population size of  $\Delta hisD$  was about 10-fold lower than the WT

341 strain 4 days after inoculation. Similarly, while a  $\Delta hrpL$  type III secretion mutant  
342 (average fitness = -2.2) achieved an apoplastic population size that was only about 1%  
343 that of the WT strain, the population size of a  $\Delta syrP$  deficient in production of  
344 syringomycin (average fitness = -2.1) was only slightly lower than that of the WT strain  
345 when inoculated separately into plants (Fig. 5a).

346 We also assessed fitness of directed mutants of three poorly understood genes,  
347 two of which are predicted group 1 glycosyltransferases, that contributed substantially to  
348 competitive apoplastic growth. Deletion mutants of  $\Delta eftA$  (average fitness = -1.4, a  
349 hypothetical protein), and  $\Delta Psyr\_0920$  (average fitness = -2.4, a group 1  
350 glycosyltransferase) both achieved apoplastic population sizes that were 10-fold lower  
351 than that of the WT strain when assessed both 4 and 6 days after inoculation (Fig. 5b).  
352 In contrast, the apoplastic population size of  $\Delta Psyr\_0532$  (average fitness = -1.6, a  
353 hypothetical protein containing a group 1 glycosyltransferase domain), was only slightly  
354 less than that of the WT strain (Fig. 5b).

355

### 356 **Fitness contributions of genes do not correlate well with their level of** 357 **transcriptional expression or inducibility in or on plants**

358 We compared previously published global transcriptional patterns for the genes  
359 in strain B728a when grown on leaf surfaces and in the apoplast (27) with that of the  
360 fitness values of these genes measured here to determine how predictive gene  
361 expression was to the functional role of these genes in growth in an on leaves. Both the  
362 absolute levels of gene expression in various *in planta* conditions as well as that of the  
363 changes in expression of a given gene *in planta* relative to that in cells grown in a  
364 minimal medium were used as predictors. In general, while many genes exhibited  
365 substantial elevated or depressed expression on or in plants compared to that in culture  
366 media, disruption of these same genes often had little or no impact on the competitive  
367 fitness of the mutant strain in this study (Fig. 6). For example, while many amino acid  
368 auxotrophs were significantly less fit on the leaf surface and leaf interior, expression of  
369 biosynthesis genes for tryptophan, histidine, proline, and methionine was not induced,  
370 and instead was repressed, in these habitats compared to *in vitro* conditions. Similarly,  
371 while genes involved in biosynthesis of the cofactor pantothenate (shared with

372 biosynthesis of the branched amino acids) were required for competitive fitness, their  
373 expression was down-regulated *in planta*. Likewise although the expression of genes  
374 encoding several hypothetical proteins were strongly increased *in planta*, suggesting  
375 that they may play an important role in growth on plants, their disruption had little effect  
376 on the competitive fitness of these mutant strains. Exceptions to this lack of association  
377 between gene induction and contribution to fitness are the genes (*syrP* and *syrD*)  
378 required for the biosynthesis of syringomycin in the apoplast; these genes were highly  
379 up-regulated *in planta* and mutants in this gene cluster also were much less fit.  
380 Likewise, *scrB*, involved in sucrose metabolism, is strongly up-regulated specifically in  
381 the apoplast and was also specifically required for competitive fitness in that  
382 environment. Generally, however, examples of genes in which a concordance between  
383 absolute or plant-dependent levels of transcription and their fitness contribution *in planta*  
384 were rare.

385

## 386 **Discussion**

387 Competitive colonization assays are a very sensitive method by which  
388 differences in relative fitness can be assessed. In a phenotypically heterogeneous  
389 population, changes in relative proportion of a given member provide a direct  
390 assessment of relative fitness. A notable exception that would preclude such a process  
391 would be one in which there is the production of shared goods (such as siderophores)  
392 that can be co-opted by non-producers, as predicted by the Black Queen Hypothesis  
393 (46). Random mutagenesis methods such as TnSeq, in which insertional mutant strains  
394 are grown in large pooled mixtures, have the advantage of identifying conditionally  
395 important genes in a genome-wide manner. By being intrinsically parallel in their  
396 structure, the ability to readily distinguish and enumerate each of the individuals in such  
397 a mixture by RB-TnSeq provides both a high throughput and highly sensitive means by  
398 which relative fitness of the individual strains can be assessed. Furthermore, the  
399 creation of multiple independent insertional mutants for each gene provides substantial  
400 internal replication, increasing confidence in the fitness phenotype quantified for any  
401 given gene. An advantage that RB-TnSeq has over more classical TnSeq is that the  
402 association of a given transposon insertion within a gene need be done only once, since

403 a random DNA barcode can then be unambiguously associated with that insertional  
404 event thereafter. Such a process then allows the use of the same barcoded transposon  
405 library for multiple experiments by simply sequencing and enumerating the DNA  
406 barcodes, enabling repeated interrogation of the role of the genes in a species such as  
407 *P. syringae* in many different environmental settings. The utility of RB-TnSeq has been  
408 demonstrated by its application to a myriad of different bacterial species exposed to  
409 hundreds of distinct environmental settings, enabling functions to be assigned to many  
410 previously uncharacterized genes (47). Our demonstration of the utility of RB-TnSeq in  
411 this study should enable us and others to greatly expand the association of genes in *P.*  
412 *syringae* to the myriad of functions in which it might be expected to participate, in the  
413 many chemically and physically different habitats that it colonizes.

414 *P. syringae* is a robust colonizer of both leaf surfaces and the apoplastic space of  
415 the host plant green bean. In these habitats, this strain exhibited sufficient growth to  
416 enable RB-TnSeq to quantify the contribution of individual genes that directly contribute  
417 to competitive fitness in a heterogeneous population. It would be expected that the  
418 ability of such a method to resolve differences in fitness contributions of these genes  
419 would increase with the number of generations of growth that the population of mutants  
420 would have undergone during an experiment. Given the large number of genes for  
421 which some fitness contribution could be measured, we focused our analysis here on  
422 those genes having the largest fitness contribution. Furthermore, there is generally  
423 higher statistical support for the validity of fitness estimates for those genes contributing  
424 more to fitness (Fig. S5), given that they were large and reproducible across replicate  
425 experiments. Genes associated with somewhat lower, but consistent, fitness values  
426 (Table S8) are likely also biologically significant, and future studies can explore the roles  
427 of these genes during *in planta* growth in more depth. In the current study the high  
428 internal replication intrinsic to the barcoded transposon library, and the use of several  
429 replicate experiments for each *in planta* condition has provided a compelling list of  
430 broadly important genes for further analysis.

431 Transposon-based approaches have been useful in identifying essential bacterial  
432 genes in other taxa, although our knowledge of essential genes in *Pseudomonas*  
433 species is limited. Analysis of a 100,000 strain insertional library in *P. aeruginosa*

434 identified 336 of the 5,606 genes to be essential (44). Recent work has identified 473  
435 genes as likely to be essential in *P. simiae*, 430 in *P. stutzeri*, and 325 to 442 in *P.*  
436 *fluorescens* (depending on the strain) (47). We identified 392 genes to be likely  
437 essential for B728a growth in LB, comprised of functional categories generally seen to  
438 be essential in diverse bacteria. Given that we could calculate fitness contributions for  
439 84% of the protein-coding genes in the environmental conditions tested here, the  
440 proportion of genes found to be essential in *P. syringae* appears similar to that *E. coli*  
441 and *P. stutzeri* (42).

442         The identification of genes involved in anabolic processes such as cofactor  
443 production and amino acid biosynthesis that contribute to the fitness of *P. syringae* in a  
444 given habitat provides some insight into the availability of such resources in that setting.  
445 This logic of anabolic mutants as reporters of habitat resources provides insight into the  
446 resources on the surface and in the intercellular spaces of plants. The finding of fitness  
447 defects for many amino acid biosynthetic genes is a clear example of this concept. The  
448 much lower fitness of auxotrophs for several different amino acids suggests an acute  
449 limitation of these essential metabolites both on the leaf surface and in the apoplast.  
450 Genes within the biosynthetic pathway of tryptophan had the largest effect on fitness  
451 when disrupted in our study, both on the leaf surface and in the apoplast. The  
452 biosynthesis of tryptophan is more energetically costly than other amino acids in *E. coli*  
453 (48). Additionally, tryptophan is utilized for downstream biosynthetic pathways in B728a  
454 such the synthesis of auxin, a plant hormone shown to contribute to epiphytic fitness of  
455 some bacteria (8). Similar to our observations, biosynthetic genes for tryptophan (and  
456 its precursor anthranilate) were identified as important for fitness in a TnSeq study  
457 examining *Pantoea stewartii* colonization of maize xylem (49). A TnSeq screen in  
458 *Dickeya dadantii* in rotting plant tissue also noted a significant decrease in competitive  
459 fitness *in planta* for leucine, cysteine, and lysine auxotrophs that could be negated  
460 through the external addition of amino acids (50). Since most amino acids are  
461 apparently present at relatively low concentrations in the bean apoplast (9), it could be  
462 expected that many auxotrophs are incapable of growth without the ability to synthesize  
463 these essential non-substitutable metabolites, a model supported by the observations of  
464 this study. Indeed, bacterial biosensors are often used *in situ* as an alternative to direct

465 metabolite measurement to detect diverse environmental conditions, such as sugar  
466 availability (4).

467         Unlike certain anabolic genes, those involved in central metabolism typically had  
468 more subtle phenotypes when disrupted. This is likely due to the presence of diverse  
469 and substitutable carbon and nitrogen sources such as sugars and organic acids in and  
470 on plants (9). It was noteworthy that the fitness of mutants in which sucrose 6-phosphate  
471 hydrolase encoded by *scrB* was disrupted was lower in the apoplast (fitness score -1.7).  
472 Such an observation is consistent with sucrose being the most abundant sugar in  
473 intercellular spaces (9). On the other hand, the genes involved in the metabolism of  
474 compounds of lesser abundance that are not essential would be expected to  
475 contribute somewhat incrementally to the fitness of *P. syringae* in or on leaves. While  
476 carbon availability appears to limit the growth of bacteria such as *P. syringae* on leaves  
477 (6) and might also limit the growth of this species in the apoplast, it might be expected  
478 that these various compounds represent substitutable resources (9), and that any given  
479 compound would contribute relatively little to the overall growth of such a strain if many  
480 were present in similar concentrations. In support of this conjecture, while small fitness  
481 defects were observed for several mutants harboring disruption of genes essential for  
482 catabolism of nutritive compounds, the magnitude of these fitness defects was usually  
483 low.

484         Many genes involved in polysaccharide synthesis and regulation were highly  
485 important in leaf colonization. The lipopolysaccharide found in the outer membrane of  
486 Gram-negative bacteria is known to induce the innate immune response of plant and  
487 animal hosts, yet it is required for bacterial stress tolerance in diverse environments  
488 (51). Many of the hypothetical proteins having strong plant phenotypes when disrupted  
489 here contain glycosyltransferase domains. We hypothesize that these hypothetical  
490 proteins contribute to the biosynthesis of O-antigen that decorates LPS, and thus might  
491 be involved in camouflaging the cells so as to not be perceived by plant surveillance  
492 systems. O-antigen is an essential virulence factor for *P. aeruginosa* in its colonization  
493 of animal tissues (52). While O-antigen is dispensable for growth in culture, it has been  
494 recently shown to delay the host immune response during *Xylella fastidiosa* colonization  
495 of grape xylem (53). Alternatively, glycosyltransferase activity may contribute to flagellar



496 modifications in order to avoid plant recognition (54, 55). However, this is unlikely to be  
497 the major role of these selected genes in *P. syringae* since known flagellar  
498 glycosyltransferases in *P. syringae* (*fgt1* and *fgt2*) located adjacent to flagellar  
499 biosynthesis genes did not measurably contribute to competitive fitness *in planta* in this  
500 study. Nonetheless, we show that 8 genes containing glycosyltransferase domains  
501 made large individual contributions to host colonization, suggesting that there may be  
502 other important targets for such modification.

503         Biosynthesis of the exopolysaccharide alginate contributed strongly to growth in  
504 the apoplast but not on leaf surfaces. While alginate had been shown to contribute to  
505 epiphytic fitness and thus to subsequent disease severity of *P. syringae* (56, 57), the  
506 apoplastic colonization of mutants was not distinguished from epiphytic growth in those  
507 studies. The apoplast is thought to be a water-limiting environment for endophytic  
508 pathogens (10, 12, 27). Furthermore, the transcriptional activation of the key alginate  
509 biosynthetic enzyme *algD* is induced by high osmolarity (58) and thus alginate  
510 biosynthesis would be expected to contribute to fitness in the apoplast, as observed  
511 here. In *P. putida*, alginate production is required for biofilm-mediated survival under  
512 desiccating conditions (59). While we did not see a significant role of alginate on the leaf  
513 surface, its biosynthesis is a clear virulence factor in the apoplast.

514         Our screen highlighted the fitness role of many known virulence factors including  
515 the type III secretion system and the phytotoxin syringomycin. Individual secreted  
516 effector proteins did not generally contribute measurably to apoplastic colonization,  
517 while mutations in type III pilus genes significantly decreased fitness. This supports  
518 existing dogma, whereby type III effector proteins are individually dispensable and  
519 collectively essential (60). HopAB1, a secreted type III effector which we found to have  
520 the largest contribution to apoplast fitness among all secreted effectors, has been  
521 shown to have a measurable contribution to B728a growth in the bean apoplast (20).  
522 While phytotoxin production in strain B728a has been shown previously to induce  
523 symptom formation, there has not been compelling data showing a contribution to  
524 bacterial growth in plants (61). It is interesting that the genes involved in syringomycin  
525 and syringopeptin have strong negative fitness values in our study, suggesting that  
526 mutants in these pathways are impaired in growth relative to wild type. Our results

527 support the model that *P. syringae* strains such as B728a with relatively fewer type III  
528 effectors have an increased reliance on phytotoxin production for growth in the apoplast  
529 (23, 62). The biosynthetic gene cluster for syringomycin also was distinctive in that it  
530 was among the few genes that are both up-regulated *in planta* (15) and contribute to  
531 fitness. On the other hand, genes for syringolin biosynthesis while up-regulated in the  
532 apoplast (27), did not contribute to apoplastic fitness in our study. Syringolin contributes  
533 to virulence through host proteasome inhibition, which has been shown to counteract  
534 stomatal innate immunity (63). Therefore, the role of syringolin is likely limited to the  
535 transition from epiphytic to apoplastic growth, a process that was not tested here.  
536 Syringopeptin, which is also up-regulated in the apoplast (27), contributed to apoplastic  
537 fitness to a much lesser extent than syringomycin. Syringomycin and syringopeptin  
538 have the same mechanisms of action, creating membrane pores and causing ion  
539 leakage (64). It is unclear why B728a produces two seemingly redundant phytotoxins,  
540 although it has been proposed that their differential antimicrobial activities contribute to  
541 epiphytic survival (65). Both syringomycin and syringopeptin contribute to virulence on  
542 cherry (64) and lysis of tobacco protoplasts (65). Since we observed a much larger  
543 contribution to bacterial fitness in the bean apoplast from syringomycin than  
544 syringopeptin, and it is tempting to speculate that the functions of these phytotoxins in  
545 virulence may be somewhat host specific.

546         Despite the dogma that gene expression is fine-tuned to the metabolic demands  
547 of a cell, recent studies of gene expression have shown such regulation to be  
548 suboptimal for many bacterial species (33). Despite classic examples of biosynthetic  
549 pathways in *E. coli* having adaptive regulation, many genes in diverse bacteria show  
550 little correlation between when they are important for fitness and when they are most  
551 highly expressed (33). For example, constitutive expression and regulation by growth  
552 rate are common indirect gene regulation strategies that occur for genes with diverse  
553 functions and yet are often suboptimal in the laboratory and presumably also in natural  
554 environments (33). In *P. aeruginosa* wound infections, gene expression was also not  
555 well correlated with gene contributions to fitness (35). A proposed explanation for such  
556 incongruence was that given that *P. aeruginosa* is considered an opportunistic  
557 pathogen that might not have evolved primarily in association with mammalian tissues

558 its patterns of gene expression might have optimized fitness in very different settings  
559 (35). Moreover, in persistent, long-lasting infections such as the cystic fibrosis lung,  
560 adaptive changes in global patterns of gene expression in *P. aeruginosa* have been  
561 observed over time (66), reflecting adaptation to this new habitat.

562 While *P. syringae* is a model plant pathogen, it is also commonly observed in  
563 many other environmental settings (19). The conditions that the cell would experience  
564 on the surface of the plant are likely to be quite different from those in the apoplast (3,  
565 13). Here, we see no correlation between gene expression (either absolute or relative  
566 change) and contribution to fitness in the host. While the timing of sampling of RNA  
567 from the apoplast for this comparative study was somewhat earlier in the infection  
568 process (Yu *et al.* (27) sampled bacterial cells 2 days post inoculation, while we  
569 sampled after 6 days), we would not have expected temporal changes in gene  
570 expression to overwhelm any context-dependent patterns of gene expression. It was  
571 surprising that genes that were highly expressed and/or highly induced in cells in or on  
572 leaves did not make large contributions to the fitness of the strain. Likewise, many  
573 genes that were either weakly expressed or un-induced on or in plants proved  
574 particularly important for fitness in these habitats. This lack of congruence can be  
575 explained by the fact that many genes are involved in catabolic processes wherein  
576 individual pathways would be expected to contribute only incrementally to the success  
577 of a strain. Genes for anabolic pathways, on the other hand, might prove essential  
578 irrespective of how highly expressed they are. There remain many genes for which the  
579 lack of linkage between expression and contribution to fitness remain unexplained. It is  
580 evident that directly measuring the contribution of a gene to fitness in different  
581 environments is a necessary complement to global transcriptional profiling to  
582 understanding the function and behavior of a cell in a given setting.

583 Although *P. syringae* is a ubiquitous species, it is most commonly studied in its  
584 agriculturally relevant, disease susceptible plant hosts. Random mutagenesis studies  
585 typically observe that a majority of genes in the genome are dispensable, as seen in the  
586 relatively small number of essential genes across diverse bacteria (67). This is likely  
587 due to many genes contributing to bacterial fitness in untested habitats outside of the  
588 laboratory (47). Although previous transposon screens in *P. syringae* have provided

589 information on traits required for epiphytic fitness and virulence, these have either  
590 uncovered only those genes with large effects on behavior, or which could be readily  
591 performed *in vitro* (68, 69). RB-TnSeq greatly expands our ability to interrogate the  
592 ecological determinants of such a cosmopolitan bacterium. Testing *P. syringae* and  
593 other bacterial species in a range of conditions, including those of ecological relevance  
594 such as on and in additional host and non-host plants, will enable the designation of  
595 functions for hypothetical or otherwise uncategorized proteins. Comparisons of these  
596 fitness assessments with specific *in vitro* experiments will enable the dissection of how  
597 individual genes contribute to a given process and to fitness on a eukaryotic host, a  
598 complex habitat with many distinct abiotic and biotic stressors. In such an approach,  
599 Cole *et al.* used this method to examine specific nutrient requirements for *P. simiae*  
600 colonization of *Arabidopsis* roots (43). Many of the genes found to contribute to fitness  
601 had only small effects *in planta*. Expansion of these screens through additional  
602 generations of growth will increase the accumulated fitness defects, as seen in a recent  
603 study that sequentially passaged a *Caulobacter crescentus* transposon library to identify  
604 genes affecting attachment (70). Barcoded transposon libraries were originally  
605 developed as a highly scalable tool to identify gene function in diverse *in vitro* conditions  
606 such as different growth conditions or abiotic stresses. Here we show that these same  
607 libraries can be used to better understand conditionally important genes that contribute  
608 to growth on the leaf surface and during colonization of the apoplast, expanding our  
609 understanding of the ecological fitness requirements on a genome-wide scale.

610

## 611 **Materials and Methods**

612 Bacterial strains and growth media.

613 *P. syringae* pv. *syringae* B728a was originally isolated from a bean leaf  
614 (*Phaseolus vulgaris*) in Wisconsin (17). The complete genome for B728a is available on  
615 NCBI GenBank as accession CP000075.1 (71). B728a and derivative mutant strains  
616 were grown on King's B agar or in broth (72), at 28°C. *E. coli* strains S17-1, TOP10, and  
617 XL1-Blue were grown on LB agar or in LB broth at 37°C. When appropriate, the  
618 following antibiotics were used at the indicated concentrations: 100 µg/ml rifampicin, 50

619  $\mu\text{g/ml}$  kanamycin, 15  $\mu\text{g/ml}$  tetracycline, 40  $\mu\text{g/ml}$  nitrofurantoin, and 21.6  $\mu\text{g/ml}$   
620 natamycin.

621

622 Construction of bar-coded transposon library.

623 The bar-coded transposon insertion library was constructed by transposon  
624 mutagenesis using a bar-coded *mariner* transposon library, followed by TnSeq mapping  
625 and barcode association as previously described (42). The *E. coli* WM3064 donor  
626 library containing the barcoded *mariner* plasmid, pKMW3, was recovered from a  
627 glycerol stock in LB kanamycin containing 300  $\mu\text{M}$  diaminopimelic acid (DAP) and  
628 conjugated into B728a overnight on LB plates containing DAP. The conjugation mixture  
629 was resuspended and spread on LB kanamycin plates for selecting mutants. Over  
630 220,000 kanamycin resistant B728a colonies were pooled for the library. All colonies  
631 were resuspended in 250 ml LB kanamycin and diluted to a starting  $\text{OD}_{600}$  0.2 for  
632 outgrowth at 28°C with shaking to  $\text{OD}_{600}$  1.0. Finally, 250  $\mu\text{l}$  80% glycerol was added to  
633 1 ml aliquots and frozen at -80°C.

634

635 Plant growth conditions.

636 Common bean (*P. vulgaris* var. Blue Lake Bush) seeds (5 - 7 per 10 cm diameter  
637 pot) were planted in Super Soil and grown in a greenhouse for two weeks before  
638 inoculation. Leaves were kept dry to minimize epiphytic contamination.

639

640 Library recovery and growth in KB.

641 For each inoculation, a 1.25 ml glycerol stock containing the transposon library  
642 was inoculated from -80°C into 25 ml fresh KB with 100  $\mu\text{g/ml}$  kanamycin and grown for  
643 approximately 7 hours at 28°C with shaking until the culture reached mid-log phase,  
644  $\text{OD}_{600}$  0.5 - 0.7. Time0 samples were collected at this point during recovery; 1 ml  
645 aliquots were pelleted by centrifugation and the pellets were frozen until DNA  
646 purification. Cells were then washed twice in 10 mM  $\text{KPO}_4$  prior to plant inoculation.

647 To assay library growth in KB, 50  $\mu\text{l}$  log phase cell culture ( $\text{OD}_{600}$  0.5) was  
648 inoculated into 950  $\mu\text{l}$  KB with kanamycin in a 24-well plate. The plate was incubated at

649 28°C with shaking for 15 hours. Cells were collected by centrifugation, and frozen prior  
650 to DNA purification.

651

652 Plant inoculations of the transposon library.

653 For epiphytic inoculations, cells were resuspended to a concentration of  $2 \times 10^6$   
654 CFU/ml 10 mM  $KPO_4$  ( $OD_{600} = 0.001$ , by dilution from  $OD_{600} = 0.1$ ), and sprayed onto  
655 the leaf surface until runoff. 100 pots were inoculated for a given experiment. Plants  
656 were then placed in a high humidity chamber for two days.

657 For apoplastic inoculations, cells were resuspended to a concentration of  $2 \times 10^5$   
658 CFU/ml 1 mM  $KPO_4$ . The soil was covered with cotton to hold the soil in place, and the  
659 pots were inverted in ~1.5 L inoculum in a glass bell jar. A vacuum was applied for 1.25  
660 minutes and then removed rapidly to force the inoculum into the apoplast. Ca. 100 pots  
661 were inoculated for a given replicate experiment. Plants were allowed to dry overnight  
662 and then moved to the greenhouse for six days.

663

664 Library isolation from the leaf surface.

665 Leaves were collected and placed in a water-filled glass dish placed in a  
666 sonication water bath to remove cells. The resulting leaf wash was filtered through a 6  
667  $\mu m$  filter (whatman #3), and then cells were collected on 0.2  $\mu m$  filters. Cells were  
668 removed from the filters by vortexing in 30 ml total 10 mM  $KPO_4$ , and centrifuged at  
669 17,000 x g for 1 minute to pellet. Cell pellet aliquots were frozen prior to DNA  
670 purification.

671

672 Library isolation from the apoplast.

673 Leaves were chopped in a blender and placed in a water-filled glass dish placed  
674 in a sonication water bath to remove cells. The resulting slurry was filtered through a  
675 coffee filter to minimize plant debris. 10% of the ~5-10 L buffer was taken for additional  
676 filtration steps. This sample was filtered through several whatman filters (20  $\mu m$ , 10  $\mu m$ ,  
677 and 6  $\mu m$ ), and then concentrated by centrifugation at 4696 x g for 10 minutes. The  
678 pellet was resuspended in water, and aliquots of cell pellets were frozen prior to DNA  
679 purification.

680

681 DNA isolation and library preparation.

682 DNA from frozen pellets was isolated using the Qiagen DNeasy Blood & Tissue  
683 Kit according to manufacturer's instructions. Cell lysis was done at 50°C for 10 minutes  
684 as per optional instructions. For apoplastic samples with excess plant material, lysed  
685 cells were centrifuged at 1,500 x g for 5 minutes before loading the supernatant onto  
686 purification columns. Purified genomic DNA was measured on a nanodrop and 200 ng  
687 of total DNA was used as a template for DNA barcode amplification and adapter ligation  
688 as established previously (42). For each time0 and plant experimental sample, two  
689 separately purified DNA samples were sequenced as technical replicates.

690

691 Sequencing and fitness data generation.

692 Barcode sequencing, mapping, and analysis to calculate the relative abundance  
693 of barcodes was done using the RB-TnSeq methodology and computation pipeline  
694 developed by Wetmore *et al.* (42); code available at [bitbucket.org/berkeleylab/feba/](http://bitbucket.org/berkeleylab/feba/).  
695 TnSeq was used to map the insertion sites and associate the DNA barcodes to these  
696 insertions. Based on the TnSeq data, standard computational methods (47) were used  
697 to predict which genes are likely essential for viability in LB. For these data, the  
698 minimum gene length to call a gene essential was 325 bp. For each experiment, fitness  
699 values for each gene are calculated as a  $\log_2$  ratio of relative barcode abundance  
700 following library growth in a given condition divided by relative abundance in the time0  
701 sample. Fitness values are normalized across the genome so the typical gene has a  
702 fitness value of 0. All experiments passed previously described quality control metrics  
703 (42). Experimental fitness values are publically available at [fit.genomics.lbl.gov](http://fit.genomics.lbl.gov).

704

705 Comparison of *P. aeruginosa* predicted essential genes to genes lacking fitness data.

706 We used the Integrated Microbial Genomes (IMG) database (73) to identify  
707 homologs for B728a genes in *P. aeruginosa* PAO1 using the genome-gene best  
708 homologs function. Turner *et al.* predicted 336 essential genes in PAO1 using a Monte  
709 Carlo statistical analysis (44). A comparison of B728a genes predicted to be essential

710 (N = 392) with their PAO1 homologs identified three categories: predicted essential and  
711 nonessential PAO1 genes, as well as B728a genes with no PAO1 homologs identified.

712

713 Genomic fitness data analysis.

714 A dendrogram of experiments was generated from the matrix of fitness values  
715 using the `hclust` function in R (74) with the default clustering method “Euclidean”. To  
716 better classify genes based on their genomic annotation, we assigned gene names,  
717 gene product descriptions, and broad functional categories based on the previously  
718 annotated genomic metadata (27). For each gene, fitness values for experimental  
719 replicates were averaged to calculate an average gene fitness score for each treatment.  
720 We focused our analysis on genes with average fitness  $< -2$  and  $t < -3$  in at least two  
721 experimental replicates. However, we also considered genes for analysis with average  
722 fitness  $< -1$  and  $t < -3$  in at least two experimental replicates. The  $t$ -score is a test  
723 statistic used to assess the statistical significance of the gene fitness scores (42). For  
724 each functional category, we used a hypergeometric test (`phyper` function in R) to  
725 examine category enrichment, using average fitness  $< -2$ .

726

727 Construction of targeted deletion mutants.

728 Deletion strains were constructed using an overlap extension PCR protocol as  
729 describe previously (75). Briefly, 1kb DNA fragments upstream and downstream the  
730 genes of interest were amplified along with a kanamycin resistance cassette from  
731 pKD13 (76). These three fragments were joined by overlap extension PCR. The  
732 resulting fragment was blunt-end ligated into the `SmaI` site of pTsacB (77), and  
733 transformed into the *E. coli* subcloning strains TOP10 or XL1-Blue, and then the *E. coli*  
734 conjugation donor strain S17-1. This suicide plasmid was conjugated into B728a on KB  
735 overnight, and then selected for 3 days on KB containing kanamycin and nitrofurantoin  
736 (*E. coli* counter selection). Putative double-crossover colonies that were kanamycin  
737 resistant and tetracycline sensitive were selected for screening using external primers  
738 and further confirmed by PCR and Sanger sequencing.

739

740 Bacterial apoplasmic growth measurements.



741            Strains were grown overnight on KB, washed in 10 mM KPO<sub>4</sub>, and standardized  
742 to 2x10<sup>5</sup> CFU/ml in 1 mM KPO<sub>4</sub>. Cells were inoculated into leaves of two-week old  
743 plants using a blunt syringe. Leaf samples were taken using a 5 mm-diameter cork  
744 borer into tubes containing 200 µl 10 mM KPO<sub>4</sub> and two 3 mm glass beads, and ground  
745 for 30 seconds at 2400 rpm in a Mini-Beadbeater-96 (Biospec Products) before dilution  
746 plating on KB with rifampicin and natamycin (an anti-fungal).

747 **Acknowledgements**

748

749 We thank Morgan Price for assistance with RB-TnSeq sequence analysis, and  
750 Jayashree Ray for mapping the insertions sites of the B728a transposon library. We  
751 thank Russell Scott for the B728a  $\Delta hrpL$  strain. We thank Dana King, Caitlin Ongsarte,  
752 and Jennifer Lam for assistance with plant inoculations. Funding for Tyler Helmann was  
753 partially provided by the Arnon Graduate Fellowship and the William Carroll Smith  
754 Fellowship. This work used the Vincent J. Coates Genomics Sequencing Laboratory at  
755 UC Berkeley, supported by NIH S10 OD018174 Instrumentation Grant.

## 756 References

- 757
- 758 1. Lindemann J, Arny DC, Upper CD (1984) Use of an apparent infection threshold  
759 population of *Pseudomonas syringae* to predict incidence and severity of brown  
760 spot of bean. *Phytopathology* 74(11):1334–1339.
  - 761 2. Hirano SS, Upper CD (1983) Ecology and epidemiology of foliar bacterial plant  
762 pathogens. *Annu Rev Phytopathol* 21(1):243–269.
  - 763 3. Melotto M, Underwood W, He SY (2008) Role of Stomata in Plant Innate  
764 Immunity and Foliar Bacterial Diseases. *Annu Rev Phytopathol* 46(1):101–122.
  - 765 4. Leveau JHJ, Lindow SE (2001) Appetite of an epiphyte: Quantitative monitoring of  
766 bacterial sugar consumption in the phyllosphere. *Proc Natl Acad Sci* 98(6):3446–  
767 3453.
  - 768 5. Van Der Wal A, Leveau JHJ (2011) Modelling sugar diffusion across plant leaf  
769 cuticles: the effect of free water on substrate availability to phyllosphere bacteria.  
770 *Environ Microbiol* 13(3):792–797.
  - 771 6. Mercier J, Lindow SE (2000) Role of leaf surface sugars in colonization of plants  
772 by bacterial epiphytes. *Appl Environ Microbiol* 66(1):369–374.
  - 773 7. Vorholt JA (2012) Microbial life in the phyllosphere. *Nat Rev Microbiol*  
774 10(12):828–840.
  - 775 8. Lindow SE, Brandl MT (2003) Microbiology of the phyllosphere. *Appl Environ*  
776 *Microbiol* 69(4):1875–1883.
  - 777 9. O’Leary BM, et al. (2016) Early changes in apoplast composition associated with  
778 defence and disease in interactions between *Phaseolus vulgaris* and the halo  
779 blight pathogen *Pseudomonas syringae* pv. *phaseolicola*. *Plant Cell Environ*  
780 39(10):2172–2184.
  - 781 10. Beattie GA (2011) Water relations in the interaction of foliar bacterial pathogens  
782 with plants. *Annu Rev Phytopathol* 49(1):533–555.
  - 783 11. Aung K, Jiang Y, He SY (2018) The role of water in plant–microbe interactions.  
784 *Plant J* 93(4):771–780.
  - 785 12. Xin XF, et al. (2016) Bacteria establish an aqueous living space in plants crucial  
786 for virulence. *Nature* 539(7630):524–529.
  - 787 13. Xin XF, Kvitko B, He SY (2018) *Pseudomonas syringae*: What it takes to be a  
788 pathogen. *Nat Rev Microbiol* 16(5):316–328.
  - 789 14. Lindemann J, Arny DC, Upper CD (1984) Epiphytic populations of *Pseudomonas*  
790 *syringae* pv. *syringae* on snap bean and nonhost plants and the incidence of  
791 bacterial brown spot disease in relation to cropping patterns. *Ecol Epidemiol*  
792 74(11):1329–33.
  - 793 15. Morris CE, et al. (2008) The life history of the plant pathogen *Pseudomonas*  
794 *syringae* is linked to the water cycle. *ISME J* 2(3):321–334.
  - 795 16. Monteil CL, Bardin M, Morris CE (2014) Features of air masses associated with  
796 the deposition of *Pseudomonas syringae* and *Botrytis cinerea* by rain and  
797 snowfall. *ISME J* 8(11):2290–2304.
  - 798 17. Loper, J. E. Lindow SE (1987) Lack of evidence for in situ fluorescent pigment  
799 production by *Pseudomonas syringae* pv. *syringae* on bean leaf surfaces.  
800 *Phytopathology* 77:1449–1454.
  - 801 18. Baltrus DA, Mccann HC, Guttman DS (2017) Evolution, genomics and

- 802 epidemiology of *Pseudomonas syringae*. *Mol Plant Pathol* 18(1):152–168.
- 803 19. Morris CE, et al. (2010) Inferring the evolutionary history of the plant pathogen  
804 *Pseudomonas syringae* from its biogeography in headwaters of rivers in North  
805 America, Europe, and New Zealand. *MBio* 1(3):1–11.
- 806 20. Vinatzer BA, et al. (2006) The type III effector repertoire of *Pseudomonas*  
807 *syringae* pv. *syringae* B728a and its role in survival and disease on host and non-  
808 host plants. *Mol Microbiol* 62(1):26–44.
- 809 21. Morris CE, Lamichhane JR, Nikolić I, Stanković S, Moury B (2019) The  
810 overlapping continuum of host range among strains in the *Pseudomonas syringae*  
811 complex. *Phytopathol Res* 1(4):1–16.
- 812 22. Lindow SE (1983) The role of bacterial ice nucleation in frost injury to plants. *Ann*  
813 *Rev Phytopathol* 21(86):363–384.
- 814 23. Baltrus DA, et al. (2011) Dynamic evolution of pathogenicity revealed by  
815 sequencing and comparative genomics of 19 *Pseudomonas syringae* isolates.  
816 *PLoS Pathog* 7(7):e1002132.
- 817 24. Bender CL, Alarcon-Chaidez F, Gross DC (1999) *Pseudomonas syringae*  
818 phytotoxins: mode of action, regulation, and biosynthesis by peptide and  
819 polyketide synthetases. *Microbiol Mol Biol Rev* 63(2):266–292.
- 820 25. Morris CE, Monteil CL, Berge O (2013) The life history of *Pseudomonas*  
821 *syringae*: Linking agriculture to Earth system processes. *Annu Rev Phytopathol*  
822 51:85–104.
- 823 26. Gal M, Preston GM, Massey RC, Spiers AJ, Rainey PB (2003) Genes encoding a  
824 cellulosic polymer contribute toward the ecological success of *Pseudomonas*  
825 *fluorescens* SBW25 on plant surfaces. *Mol Ecol* 12:3109–3121.
- 826 27. Yu X, et al. (2013) Transcriptional responses of *Pseudomonas syringae* to growth  
827 in epiphytic versus apoplastic leaf sites. *Proc Natl Acad Sci* 110(5):E425–E434.
- 828 28. Nobori T, et al. (2018) Transcriptome landscape of a bacterial pathogen under  
829 plant immunity. *Proc Natl Acad Sci* 115(13):E3055–E3064.
- 830 29. Lindgren PB, et al. (1989) An ice nucleation reporter gene system: identification of  
831 inducible pathogenicity genes in *Pseudomonas syringae* pv. *phaseolicola*. *EMBO*  
832 *J* 8(5):1291–1301.
- 833 30. Boch J, et al. (2002) Identification of *Pseudomonas syringae* pv. *tomato* genes  
834 induced during infection of *Arabidopsis thaliana*. *Mol Microbiol* 44(1):73–88.
- 835 31. Marco ML, Legac J, Lindow SE (2005) *Pseudomonas syringae* genes induced  
836 during colonization of leaf surfaces. *Environ Microbiol* 7(9):1379–1391.
- 837 32. Kinkel LL, Wilson M, S.E. L (1995) Effect of Sampling Scale on the Assessment of  
838 Epiphytic Bacterial Populations. *Microb Ecol* 29(3):283–297.
- 839 33. Price MN, et al. (2013) Indirect and suboptimal control of gene expression is  
840 widespread in bacteria. *Mol Syst Biol* 9(660):1–18.
- 841 34. Zhang XX, George A, Bailey MJ, Rainey PB (2006) The histidine utilization (*hut*)  
842 genes of *Pseudomonas fluorescens* SBW25 are active on plant surfaces, but are  
843 not required for competitive colonization of sugar beet seedlings. *Microbiology*  
844 152(6):1867–1875.
- 845 35. Turner KH, Everett J, Trivedi U, Rumbaugh KP, Whiteley M (2014) Requirements  
846 for *Pseudomonas aeruginosa* acute burn and chronic surgical wound infection.  
847 *PLoS Genet* 10(7):e1004518.

- 848 36. McAdam PR, Richardson EJ, Fitzgerald RR (2014) High-throughput sequencing  
849 for the study of bacterial pathogen biology. *Curr Opin Microbiol* 19(1):106–113.
- 850 37. Rastogi G, Coaker GL, Leveau JHJ (2013) New insights into the structure and  
851 function of phyllosphere microbiota through high-throughput molecular  
852 approaches. *FEMS Microbiol Lett* 348(1):1–10.
- 853 38. Van Sluys MA, et al. (2002) Comparative genomic analysis of plant-associated  
854 bacteria. *Annu Rev Phytopathol* 40(1):169–189.
- 855 39. Levy A, et al. (2018) Genomic features of bacterial adaptation to plants. *Nat*  
856 *Genet* 50(1):138–150.
- 857 40. Melnyk RA, Hossain SS, Haney CH (2019) Convergent gain and loss of genomic  
858 islands drives lifestyle changes in plant-associated *Pseudomonas*. *ISME J* In  
859 Press. doi:10.1101/345488.
- 860 41. van Opijnen T, Bodi KL, Camilli A (2009) Tn-seq: high-throughput parallel  
861 sequencing for fitness and genetic interaction studies in microorganisms. *Nat*  
862 *Methods* 6(10):767–772.
- 863 42. Wetmore KM, et al. (2015) Sequencing Randomly Bar-Coded Transposons. *MBio*  
864 6(6):1–15.
- 865 43. Cole BJ, et al. (2017) Genome-wide identification of bacterial plant colonization  
866 genes. *PLoS Biol* 15(9):1–24.
- 867 44. Turner KH, Wessel AK, Palmer GC, Murray JL, Whiteley M (2015) Essential  
868 genome of *Pseudomonas aeruginosa* in cystic fibrosis sputum. *Proc Natl Acad*  
869 *Sci* 112(13):4110–4115.
- 870 45. Andersen GL, Beattie GA, Lindow SE (1998) Molecular characterization and  
871 sequence of a methionine biosynthetic locus from *Pseudomonas syringae*. *J*  
872 *Bacteriol* 180(17):4497–4507.
- 873 46. Morris J, Lenski RE, Zinser E (2012) The Black Queen Hypothesis: evolution of  
874 dependencies through adaptive gene loss. *MBio* 3(2):e00036-12.
- 875 47. Price MN, et al. (2018) Mutant phenotypes for thousands of bacterial genes of  
876 unknown function. *Nature* 557(7706):503–509.
- 877 48. Akashi H, Gojobori T (2002) Metabolic efficiency and amino acid composition in  
878 the proteomes of *Escherichia coli* and *Bacillus subtilis*. *Proc Natl Acad Sci*  
879 99(6):3695–3700.
- 880 49. Duong DA, Jensen R V., Stevens AM (2018) Discovery of *Pantoea stewartii* ssp.  
881 *stewartii* genes important for survival in corn xylem through a Tn-Seq analysis.  
882 *Mol Plant Pathol* 19(8):1929–1941.
- 883 50. Royet K, Parisot N, Rodrigue A, Gueguen E, Condemine G (2019) Identification  
884 by Tn-seq of *Dickeya dadantii* genes required for survival in chicory plants. *Mol*  
885 *Plant Pathol* 20(2):287–306.
- 886 51. Erbs G, Newman MA (2012) The role of lipopolysaccharide and peptidoglycan,  
887 two glycosylated bacterial microbe-associated molecular patterns (MAMPs), in  
888 plant innate immunity. *Mol Plant Pathol* 13(1):95–104.
- 889 52. Rocchetta HL, Burrows LL, Lam JS (1999) Genetics of O-antigen biosynthesis in  
890 *Pseudomonas aeruginosa*. *Microbiol Mol Biol Rev* 63(3):523–553.
- 891 53. Rapicavoli JN, et al. (2018) Lipopolysaccharide O-antigen delays plant innate  
892 immune recognition of *Xylella fastidiosa*. *Nat Commun* 9(1):390.
- 893 54. Takeuchi K, et al. (2003) Flagellin glycosylation island in *Pseudomonas syringae*

- 894 pv. *glycinea* and its role in host specificity. *J Bacteriol* 185(22):6658–6665.
- 895 55. Taguchi F, et al. (2006) Identification of glycosylation genes and glycosylated  
896 amino acids of flagellin in *Pseudomonas syringae* pv. *tabaci*. *Cell Microbiol*  
897 8(6):923–938.
- 898 56. Yu J, Penaloza-Vázquez A, Chakrabarty AM, Bender CL (1999) Involvement of  
899 the exopolysaccharide alginate in the virulence and epiphytic fitness of  
900 *Pseudomonas syringae* pv. *syringae*. *Mol Microbiol* 33(4):712–720.
- 901 57. Markel E, Stodghill P, Bao Z, Myers CR, Swingle B (2016) AlgU controls  
902 expression of virulence genes in *Pseudomonas syringae* pv. *tomato* DC3000. *J*  
903 *Bacteriol* 198(17):2330–2344.
- 904 58. Peñaloza-Vázquez A, Kidambi SP, Chakrabarty AM, Bender CL (1997)  
905 Characterization of the alginate biosynthetic gene cluster in *Pseudomonas*  
906 *syringae* pv. *syringae*. *J Bacteriol* 179(14):4464–4472.
- 907 59. Chang WS, et al. (2007) Alginate production by *Pseudomonas putida* creates a  
908 hydrated microenvironment and contributes to biofilm architecture and stress  
909 tolerance under water-limiting conditions. *J Bacteriol* 189(22):8290–8299.
- 910 60. Kvitko BH, et al. (2009) Deletions in the repertoire of *Pseudomonas syringae* pv.  
911 *tomato* DC3000 type III secretion effector genes reveal functional overlap among  
912 effectors. *PLoS Pathog* 5(4):e1000388.
- 913 61. Xu GW, Gross DC (1988) Evaluation of the role of syringomycin in plant  
914 pathogenesis by using Tn5 mutants of *Pseudomonas syringae* pv. *syringae*  
915 defective in syringomycin production. *Appl Environ Microbiol* 54(6):1345–1353.
- 916 62. Hulin MT, et al. (2018) Comparative genomics of *Pseudomonas syringae* reveals  
917 convergent gene gain and loss associated with specialization onto cherry (*Prunus*  
918 *avium*). *New Phytol* 219(2):672–696.
- 919 63. Schellenberg B, Ramel C, Dudler R (2010) *Pseudomonas syringae* virulence  
920 factor syringolin A counteracts stomatal immunity by proteasome inhibition. *Mol*  
921 *Plant-Microbe Interact* 23(10):1287–93.
- 922 64. Scholz-Schroeder BK, Hutchison ML, Grgurina I, Gross DC (2001) The  
923 contribution of syringopeptin and syringomycin to virulence of *Pseudomonas*  
924 *syringae* pv. *syringae* strain B301D on the basis of *sypA* and *syrB1* biosynthesis  
925 mutant analysis. *Mol Plant-Microbe Interact* 14(3):336–348.
- 926 65. Hutchison ML, Gross DC (1997) Lipopeptide phytotoxins produced by  
927 *Pseudomonas syringae* pv. *syringae*: comparison of the biosurfactant and ion  
928 channel-forming activities of syringopeptin and syringomycin. *Mol Plant-Microbe*  
929 *Interact* 10(3):347–354.
- 930 66. Huse HK, et al. (2010) Parallel evolution in *Pseudomonas aeruginosa* over 39,000  
931 generations *in vivo*. *MBio* 1(4):e00199-10.
- 932 67. Luo H, Lin Y, Gao F, Zhang CT, Zhang R (2014) DEG 10, an update of the  
933 database of essential genes that includes both protein-coding genes and  
934 noncoding genomic elements. *Nucleic Acids Res* 42(D1):D574–D580.
- 935 68. Manoharan B, Neale HC, Hancock JT, Jackson RW, Arnold DL (2015) The  
936 identification of genes important in *Pseudomonas syringae* pv. *phaseolicola* plant  
937 colonisation using *in vitro* screening of transposon libraries. *PLoS One*  
938 10(9):e0137355.
- 939 69. Lindow SE, Andersen G, Beattie GA (1993) Characteristics of insertional mutants

- 940 of *Pseudomonas syringae* with reduced epiphytic fitness. *Appl Environ Microbiol*  
941 59(5):1593–1601.
- 942 70. David M. Hershey AF and SC (2019) A genome-wide analysis of adhesion in  
943 *Caulobacter crescentus* identifies new regulatory and biosynthetic components for  
944 holdfast assembly. *MBio* 10(1):e02273-18.
- 945 71. Feil H, et al. (2005) Comparison of the complete genome sequences of  
946 *Pseudomonas syringae* pv. *syringae* B728a and pv. *tomato* DC3000. *Proc Natl*  
947 *Acad Sci USA* 102:11064–11069.
- 948 72. King EO, Ward MK, Raney DE (1954) Two simple media for the demonstration of  
949 pyocyanin and fluorescin. *J Lab Clin Med* 44(2):301–307.
- 950 73. Chen IMA, et al. (2019) IMG/M v.5.0: an integrated data management and  
951 comparative analysis system for microbial genomes and microbiomes. *Nucleic*  
952 *Acids Res* 47(D1):D666–D677.
- 953 74. R Core Team (2017) R: A language and environment for statistical computing.  
954 doi:10.1007/978-3-540-74686-7.
- 955 75. Hockett KL, Burch AY, Lindow SE (2013) Thermo-regulation of genes mediating  
956 motility and plant interactions in *Pseudomonas syringae*. *PLoS One* 8(3).  
957 doi:10.1371/journal.pone.0059850.
- 958 76. Datsenko KA, Wanner BL (2000) One-step inactivation of chromosomal genes in  
959 *Escherichia coli* K-12 using PCR products. *Proc Natl Acad Sci* 97(12):6640–6645.
- 960 77. Chen C, Malek AA, Wargo MJ, Hogan DA, Beattie GA (2010) The ATP-binding  
961 cassette transporter Cbc (choline/betaine/carnitine) recruits multiple substrate-  
962 binding proteins with strong specificity for distinct quaternary ammonium  
963 compounds. *Mol Microbiol* 75(1):29–45.  
964

965 **Figures**

966

967 Fig. 1. Dendrogram of experiments, generated using *P. syringae* gene fitness scores  
968 determined in experimental replicates of the three conditions tested. Rich media King's  
969 B (KB) experiments cluster more closely with the epiphytic experiments (epi) than the  
970 apoplasic experiments (apo).

971

972 Fig. 2. Rank ordered mean gene fitness scores for each condition in which *P. syringae*  
973 was grown. Fitness values for independent replicate experiments are shown in grey,  
974 while mean fitness scores are plotted in black. Gene fitness scores are calculated as  
975 the  $\log_2$  ratio of the barcode counts following growth in a given condition compared to  
976 the barcode counts before inoculation. Black lines at fitness values of -2 and 2 are used  
977 to indicate strong phenotypes; for example a value of -2 indicates that mutants in that  
978 gene were 25% as fit as the typical strain in the mutant library. In each dataset, fitness  
979 values  $< -2$  or  $> 2$  are more than 3 standard deviations from the mean (approximately  
980 0).

981

982 Fig. 3. Genes with significant contributions to competitive fitness in the experimental  
983 conditions tested. (A) Venn diagram of genes with average fitness values  $< -2$ , and  $t < -$   
984 3 for at least two experimental replicates. (B) Venn diagram of genes with average  
985 fitness scores  $< -1$ , and  $t < -3$  for at least two experimental replicates.

986

987 Fig. 4. Fitness contributions of genes involved in phytotoxin synthesis and transport and  
988 the type III secretion pilus (A) as well as alginate biosynthesis (B) are required for  
989 apoplasic colonization. An expanded version of this figure containing gene names and  
990 loci can be found in the Supplemental Material.

991

992 Fig. 5. Apoplasic growth of B728a and deletion strains in bean. (A) Growth of the amino  
993 acid auxotrophs  $\Delta trpA$  and  $\Delta hisD$ , type III regulatory mutant  $\Delta hrpL$ , and syringomycin  
994 mutant  $\Delta syrP$ . At 4 dpi,  $\Delta hisD$ ,  $\Delta hrpL$ , and  $\Delta trpA$  are significantly lower than WT B728a.  
995 At 6 dpi,  $\Delta hrpL$  and  $\Delta trpA$  are significantly different from WT (Welch Two Sample t-test,  
996  $p < 0.01$ ). (B) Apoplasic fitness of deletion mutants of glycosyltransferase genes  
997 Psyr\_0532 and Psyr\_0920, and hypothetical protein *eftA*. At both 4 and 6 dpi, the  
998 population size of  $\Delta eftA$  and  $\Delta 0920$  are significantly lower than WT B728a (Welch Two  
999 Sample t-test,  $p < 0.01$ ).

1000

1001 Fig. 6. The magnitude of fitness contributions of genes in *P. syringae* do not correlate  
1002 well with their absolute level of expression (A) or fold-change of these genes *in planta*  
1003 compared to that in a minimal medium (B). Absolute expression is a measure of  
1004 fluorescence in microarrays (27). Values of average fitness of mutants either less than -  
1005 0.5 or greater than 0.5 are highlighted in red. Fold change in gene expression was  
1006 calculated as a  $\log_2$  of the ratio of gene expression estimated from microarray  
1007 fluorescence *in planta* relative to that in a basal medium (27).



# Cluster dendrogram of experiments

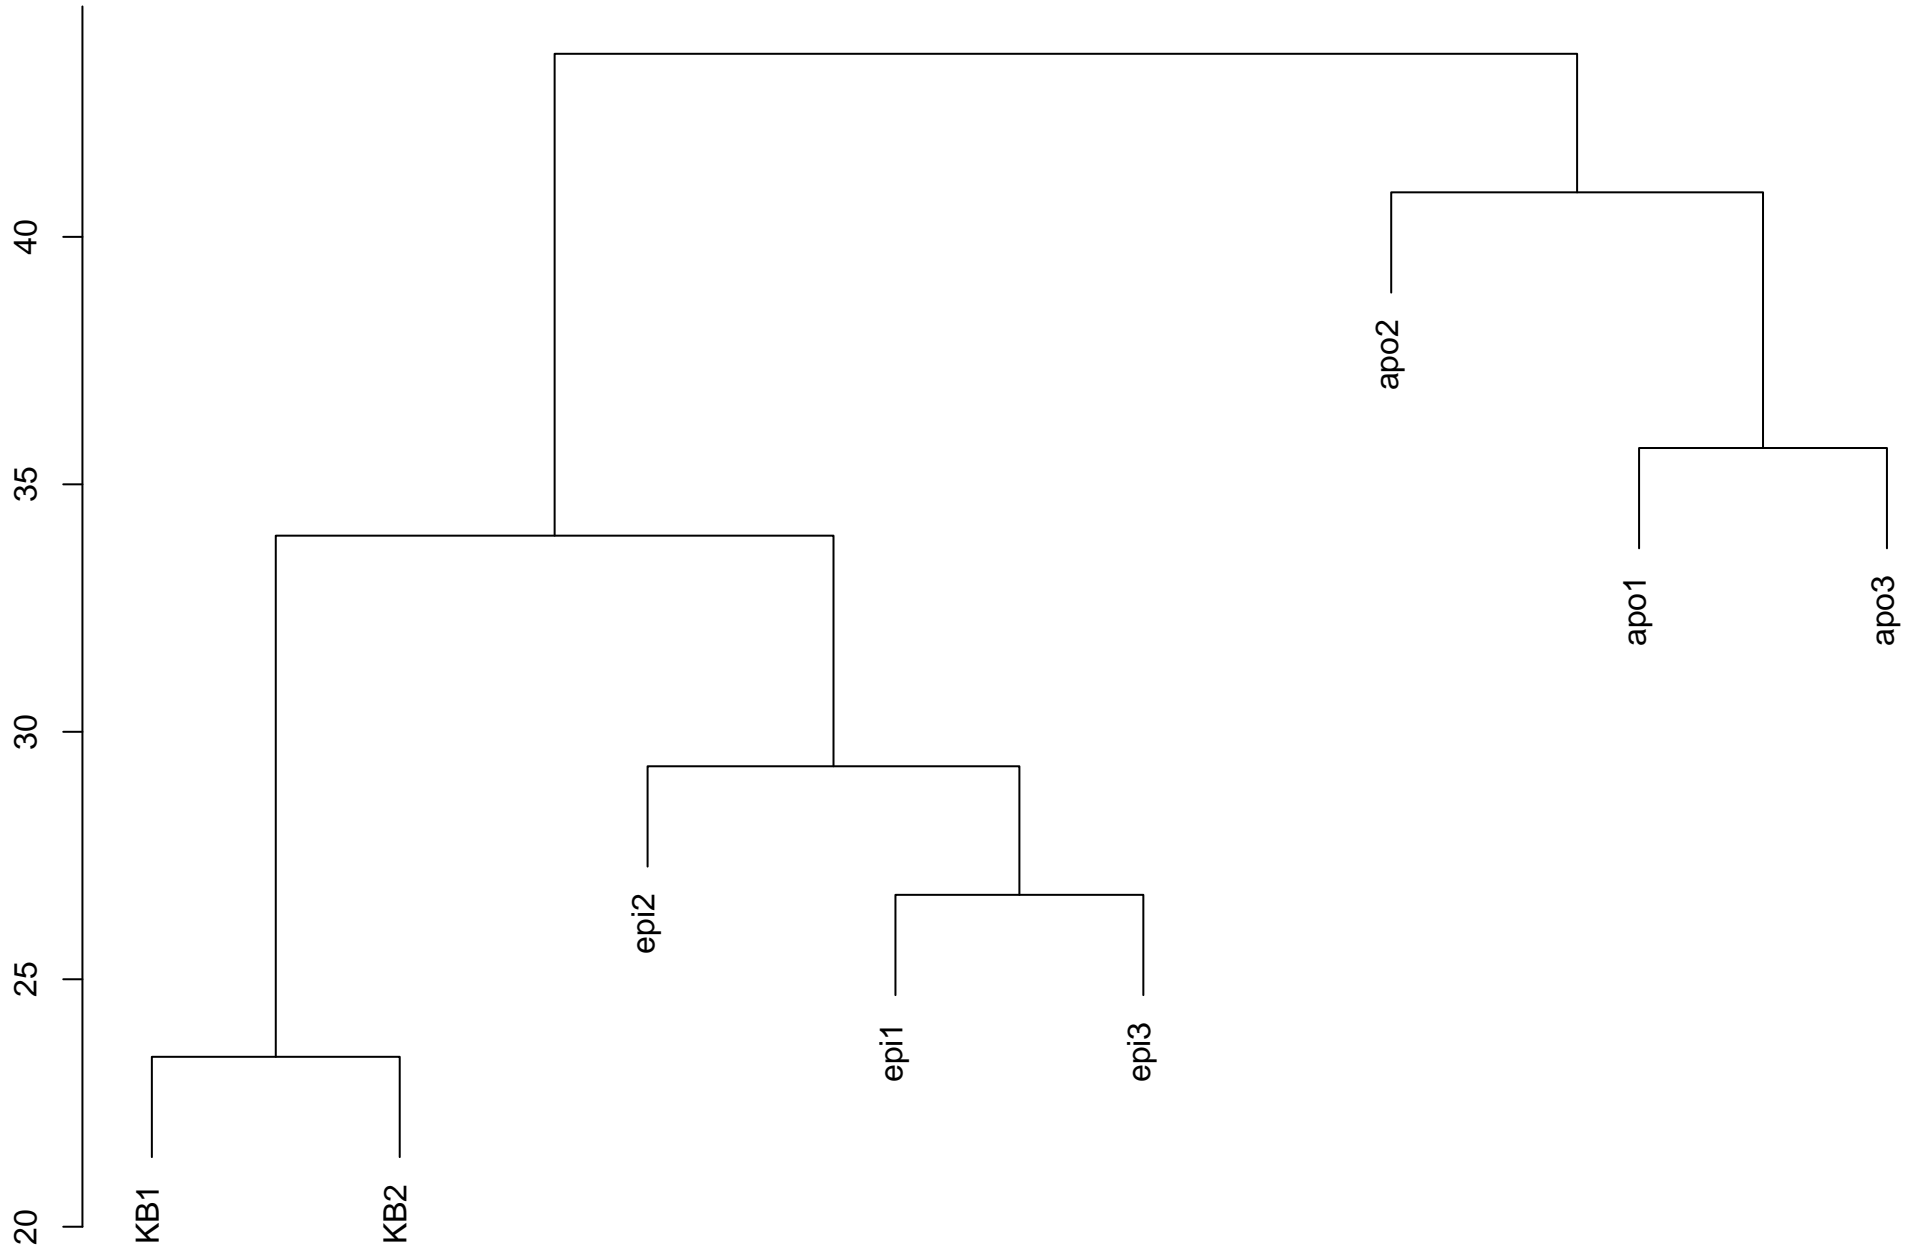

hclust (\*, "complete")

King's B

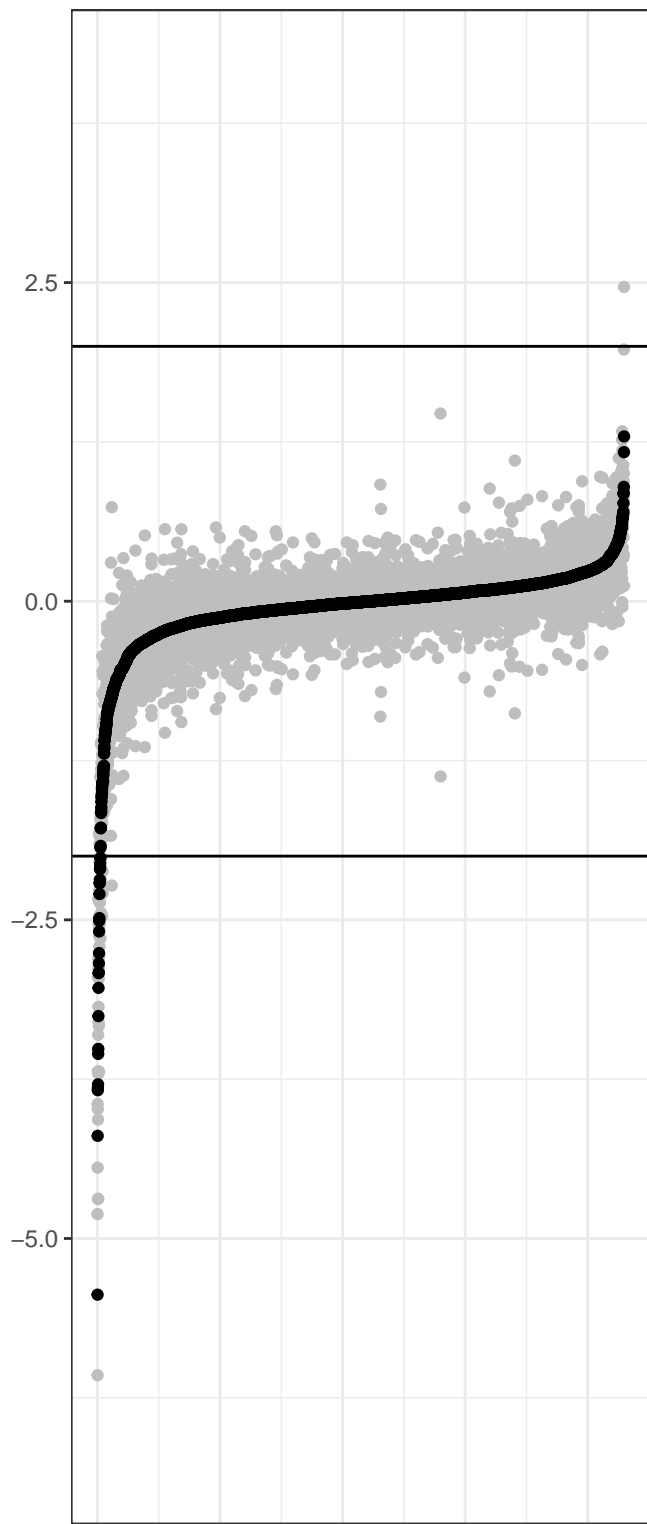

Epiphytic

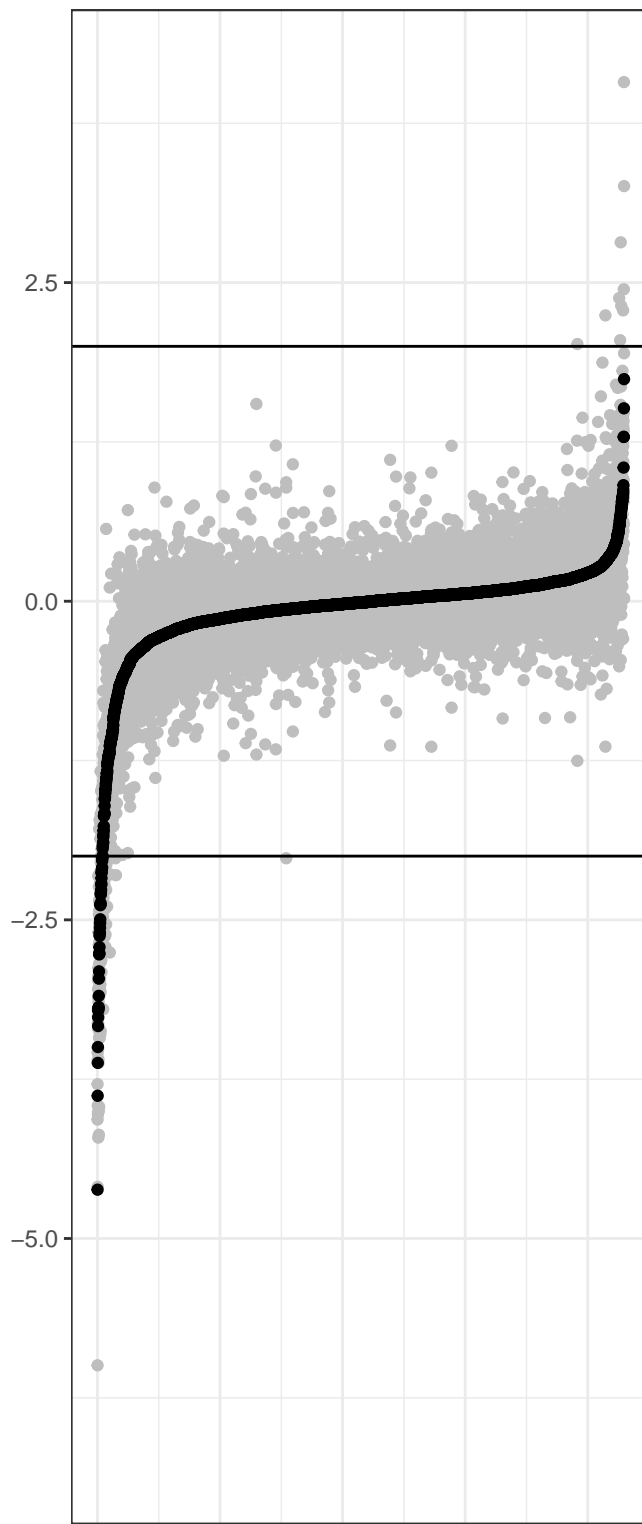

Apoplastic

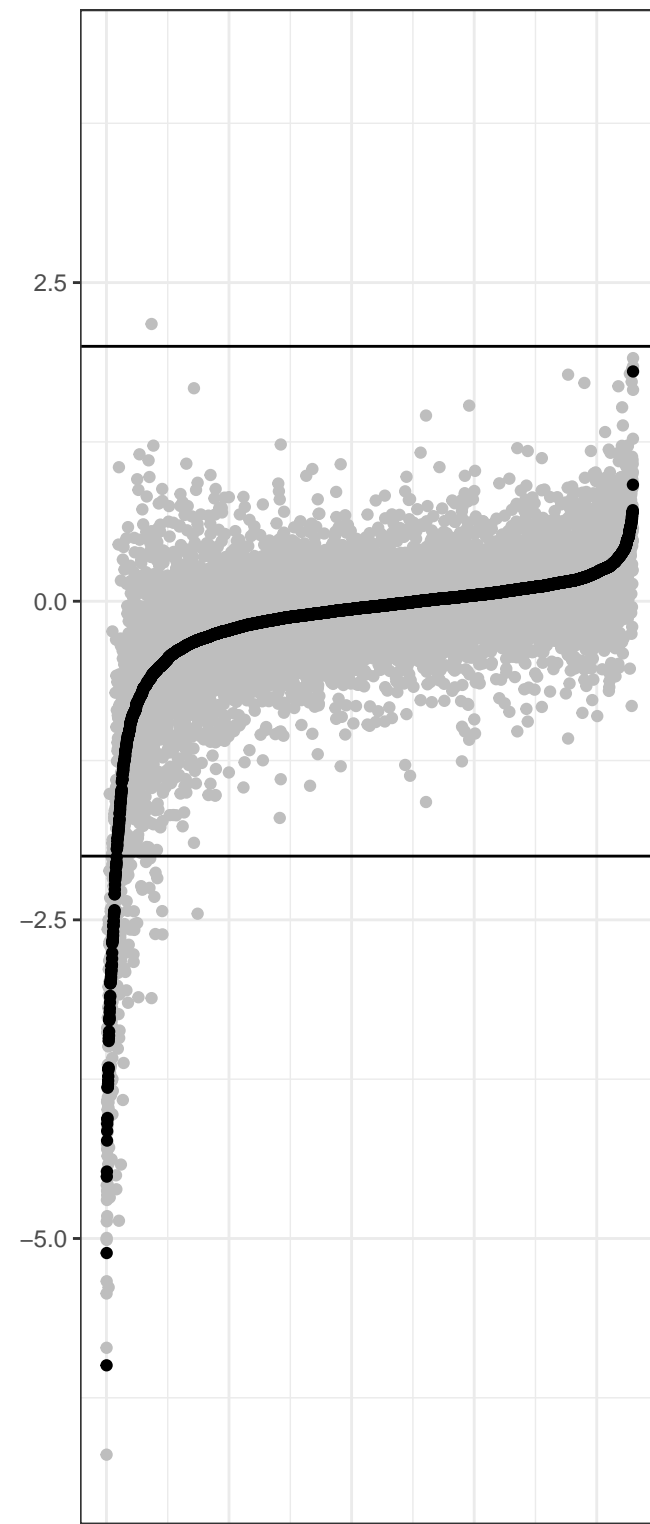

Genes, ranked by mean fitness score

**A.** Genes with average fitness  $< -2$   
and  $t < -3$  for at least two replicates

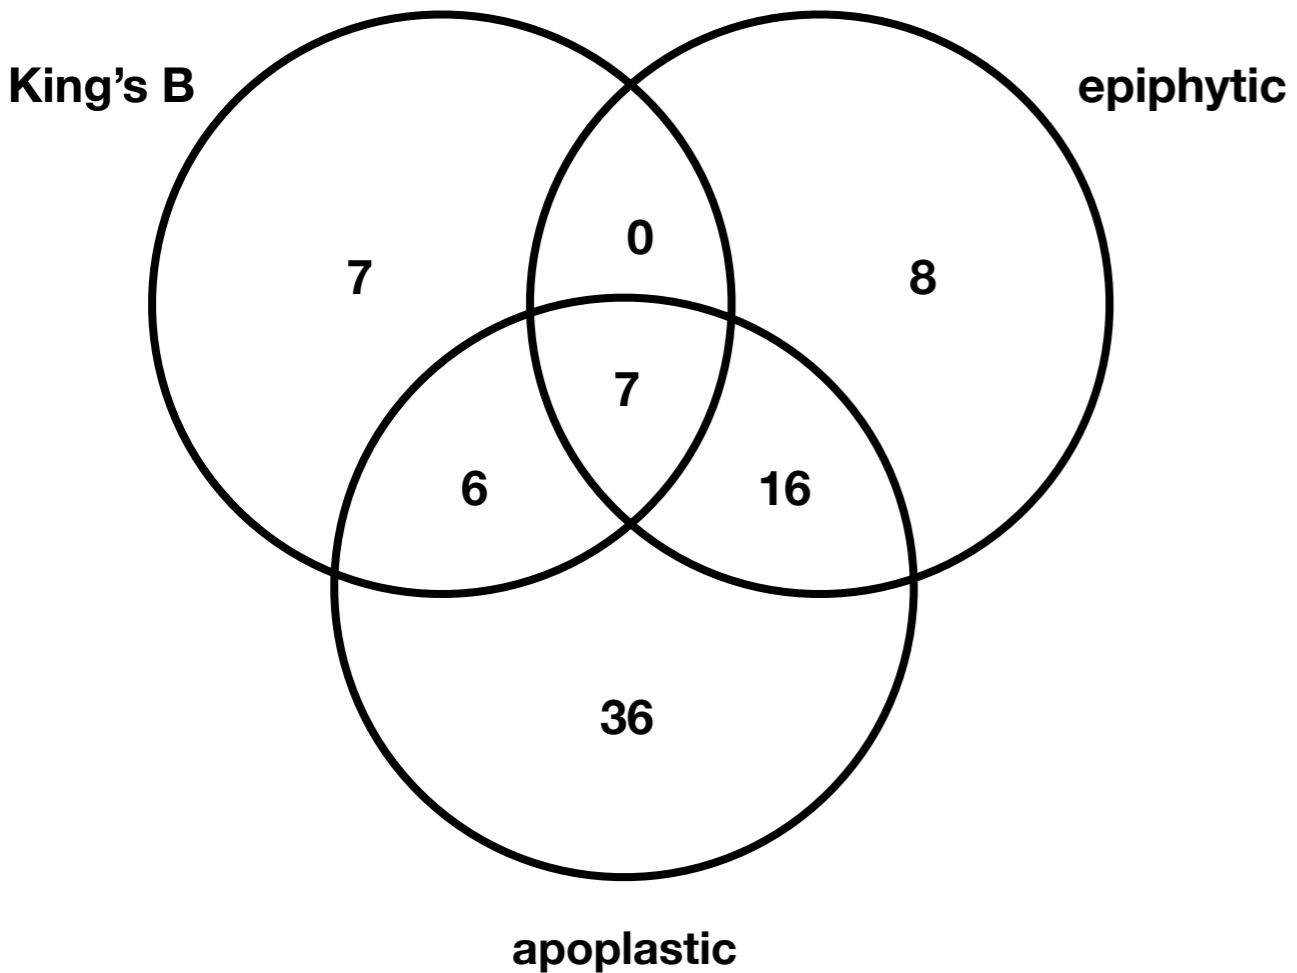

**B.** Genes with average fitness  $< -1$   
and  $t < -3$  for at least two replicates

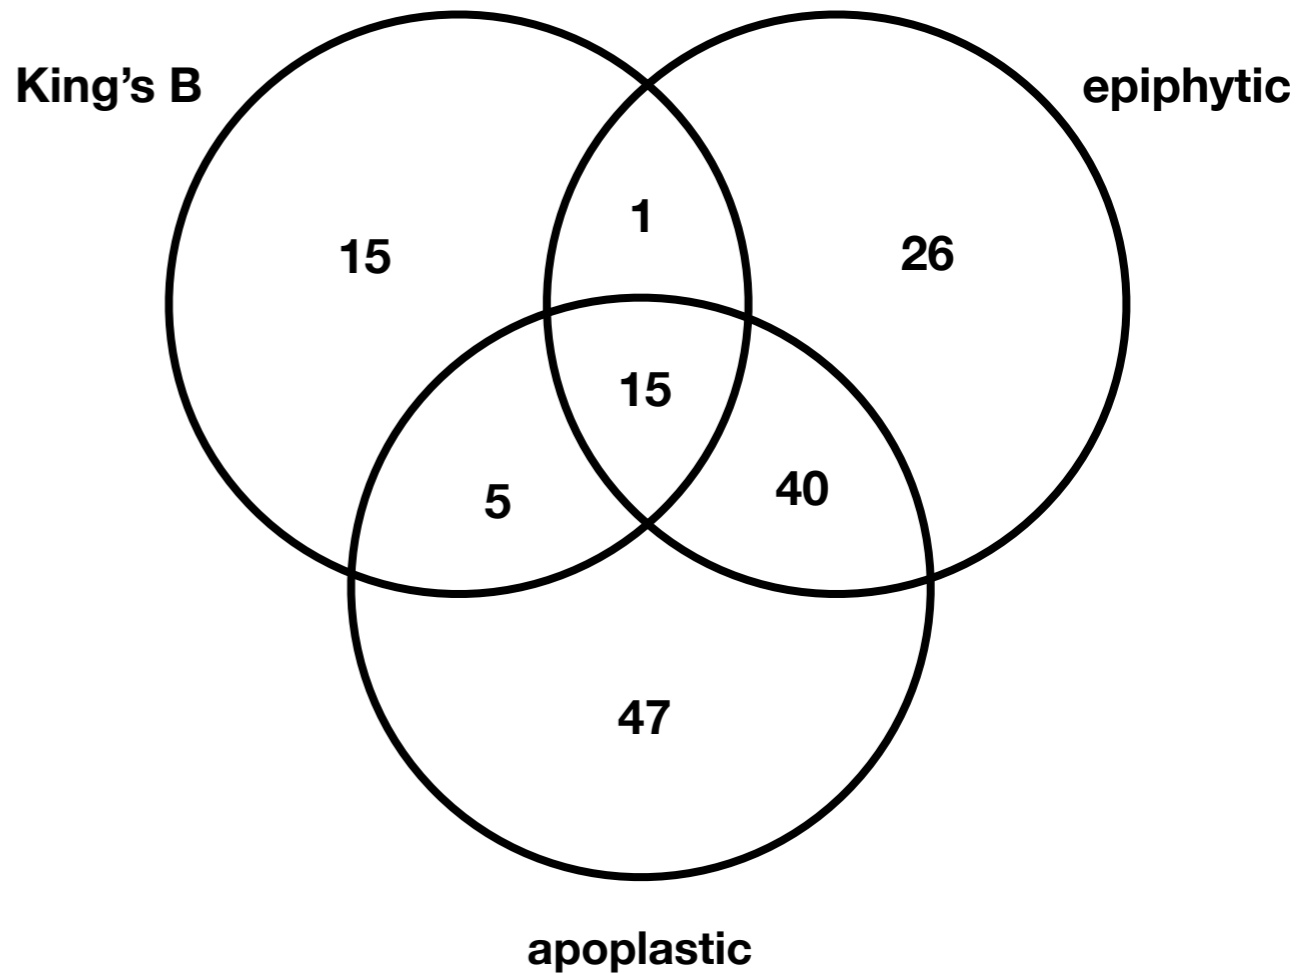

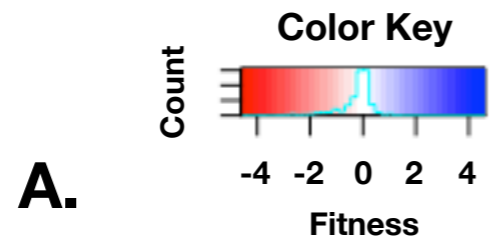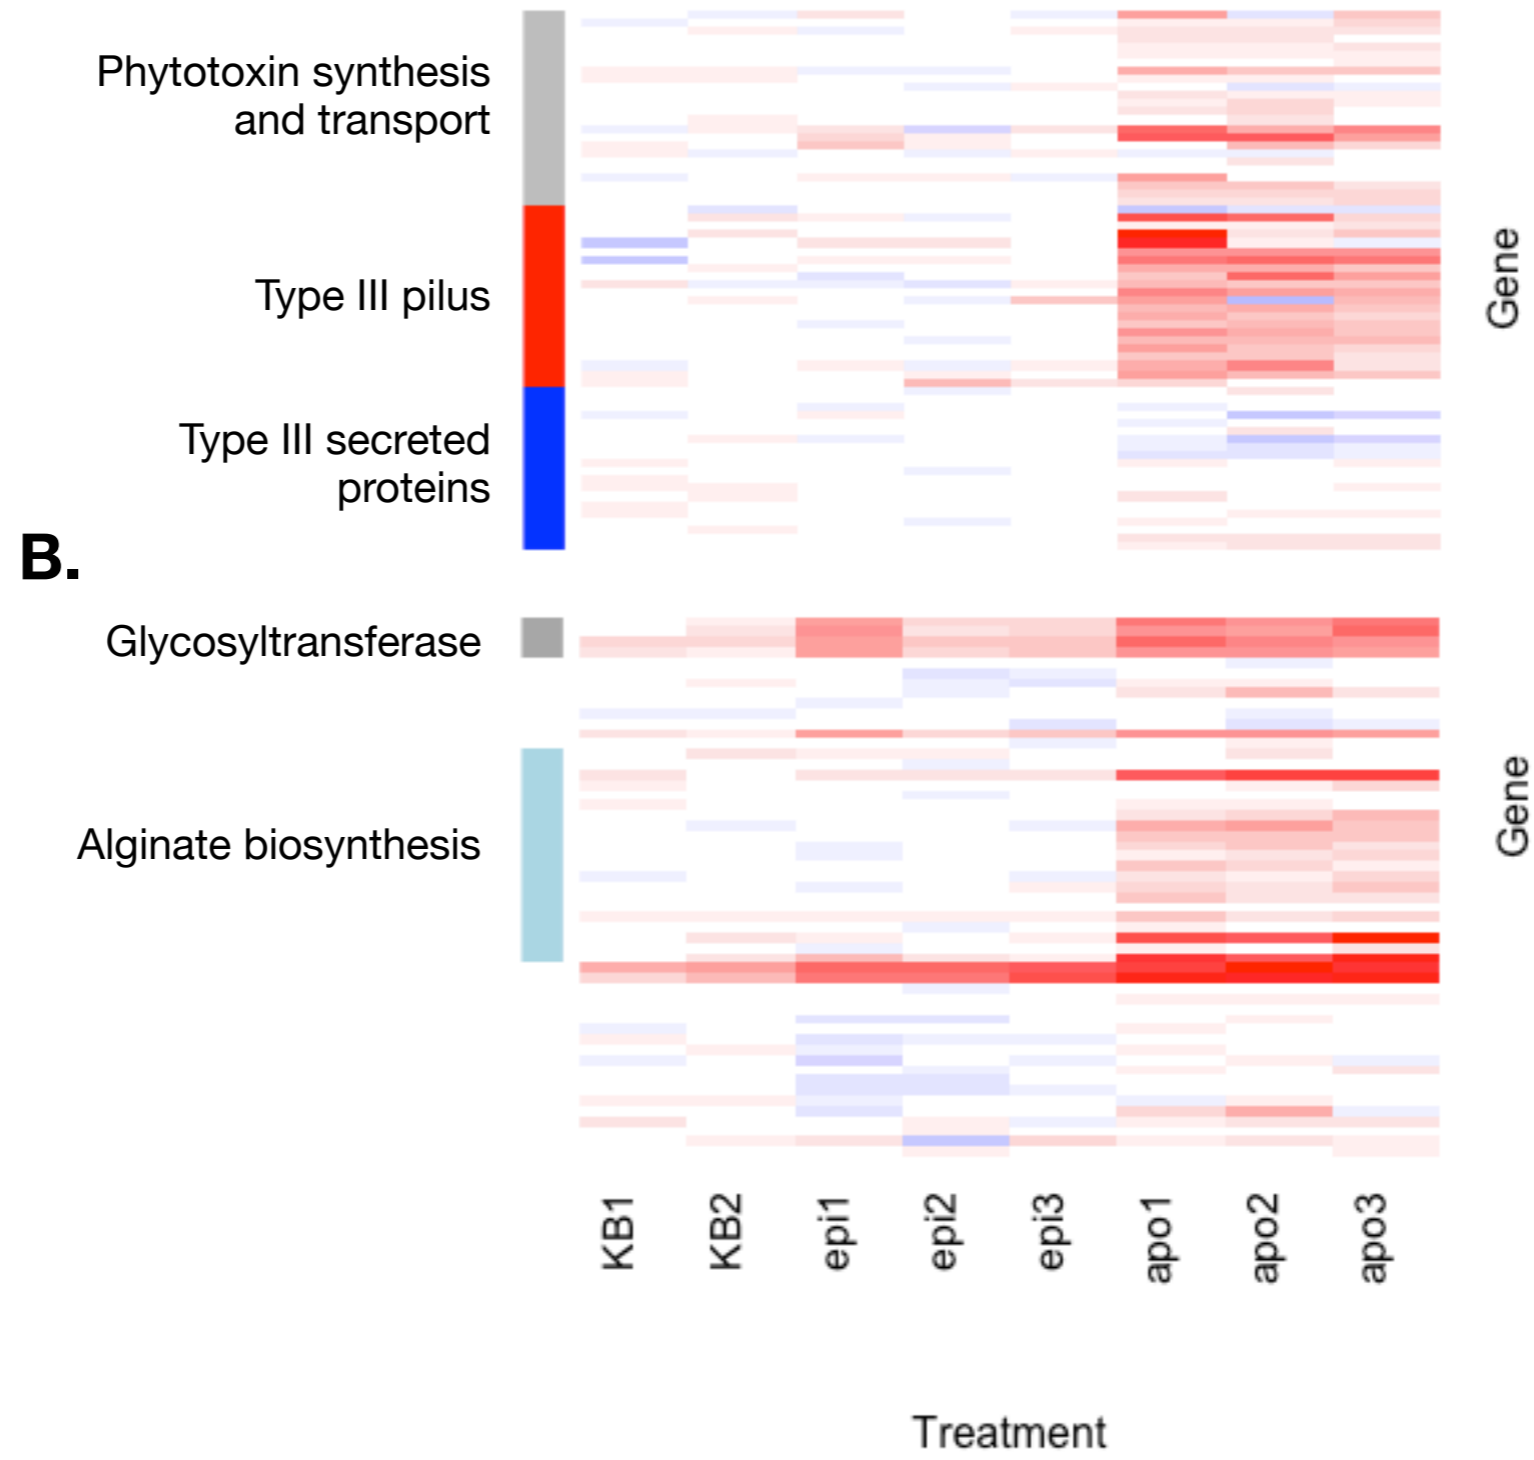

# A. B728a growth in the green bean apoplast

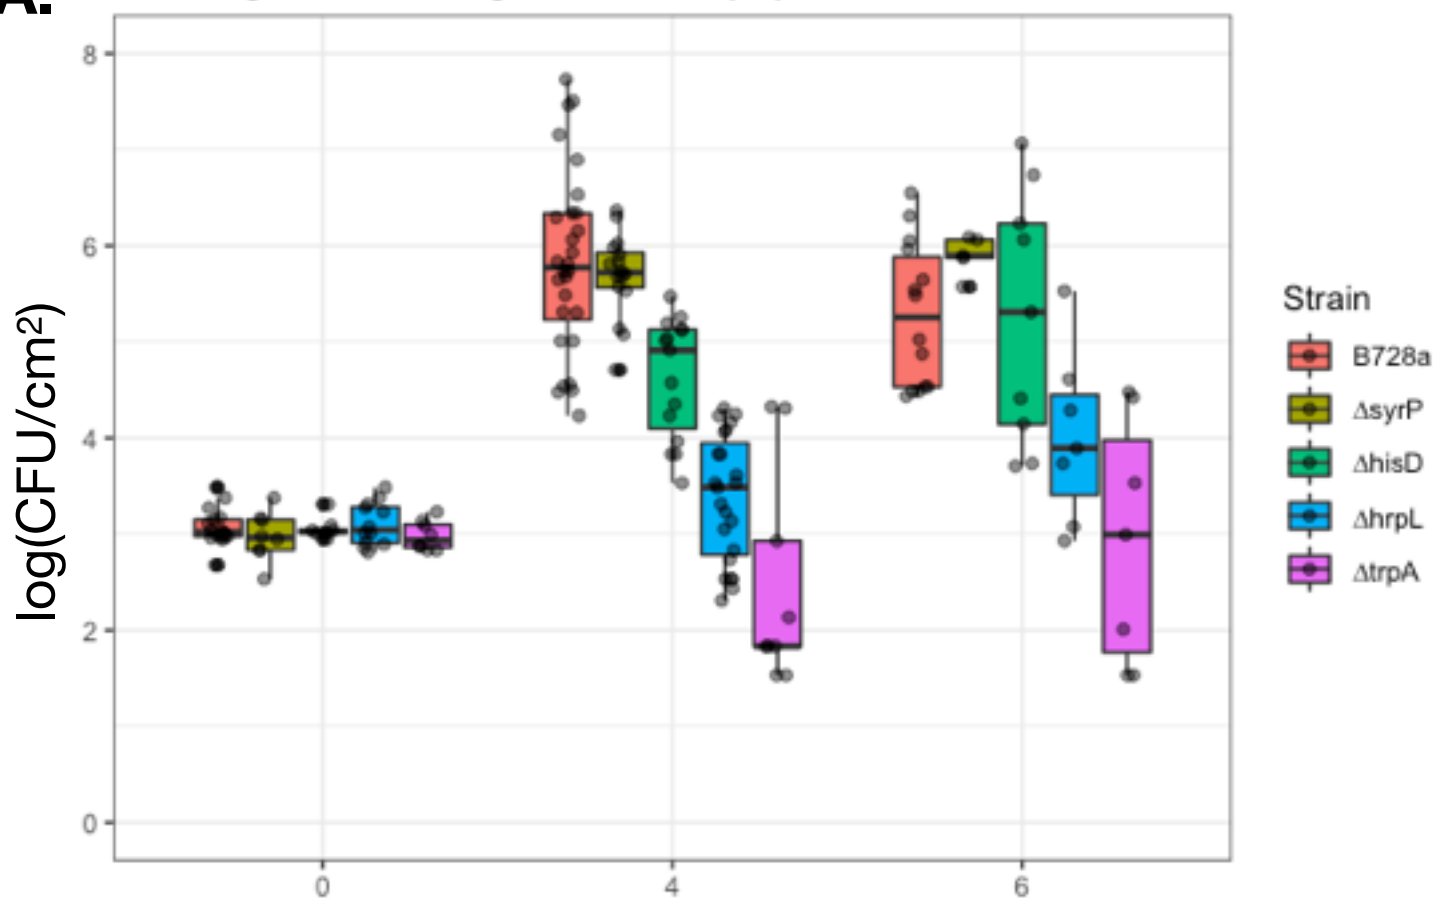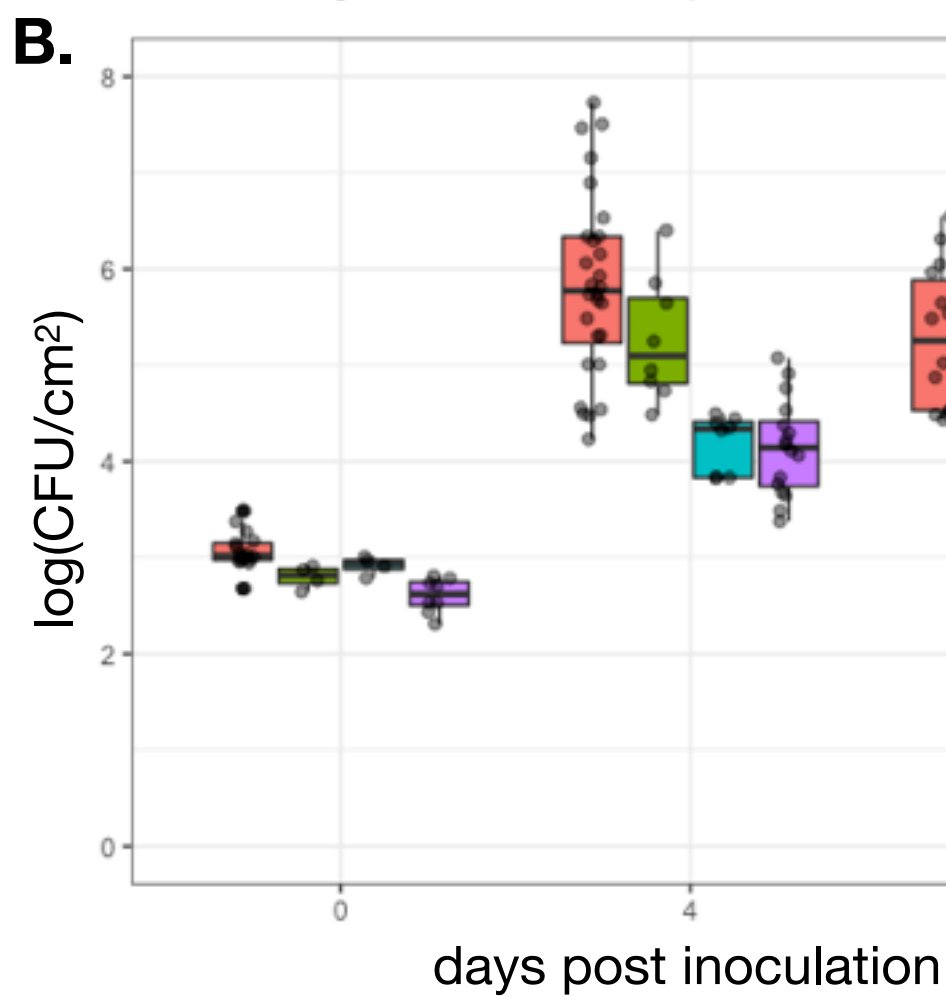

**A.**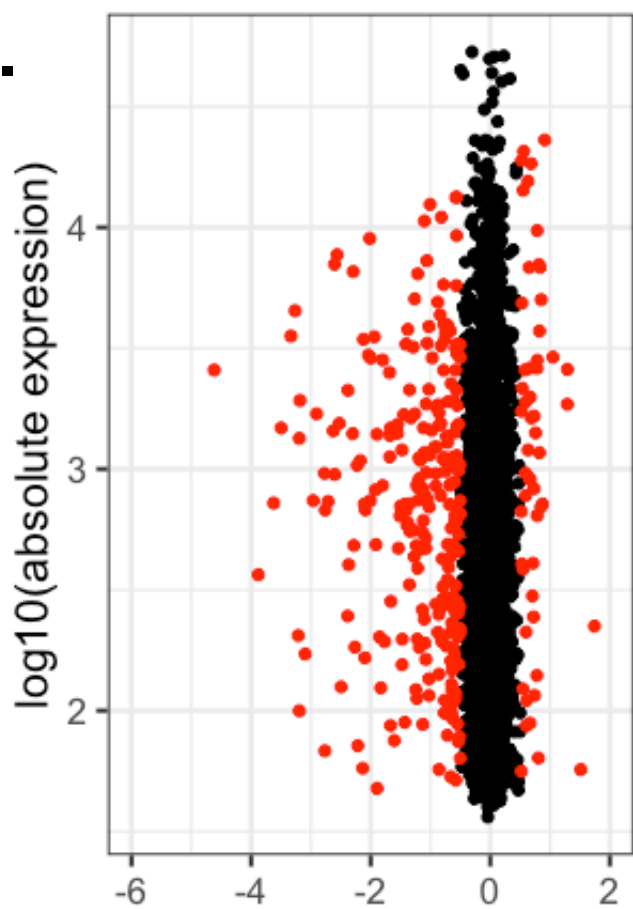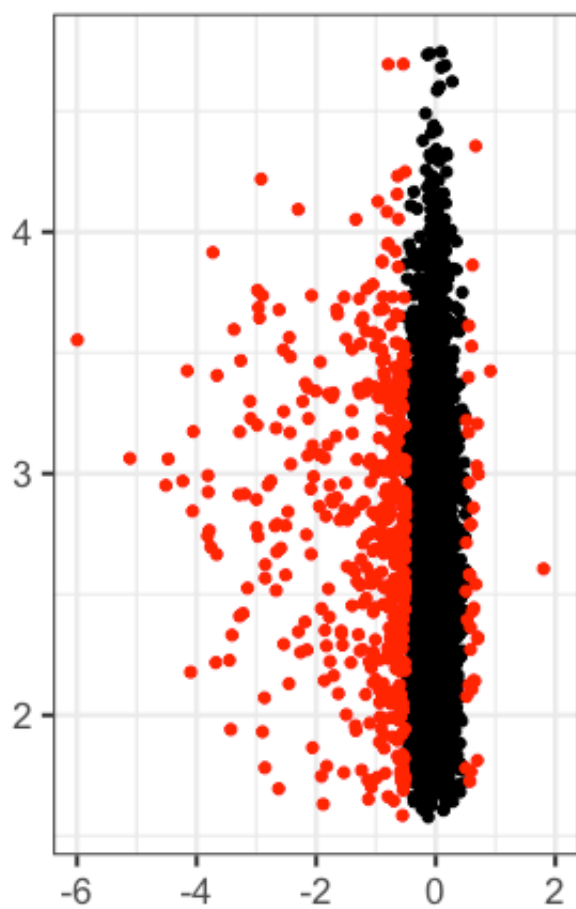**B.**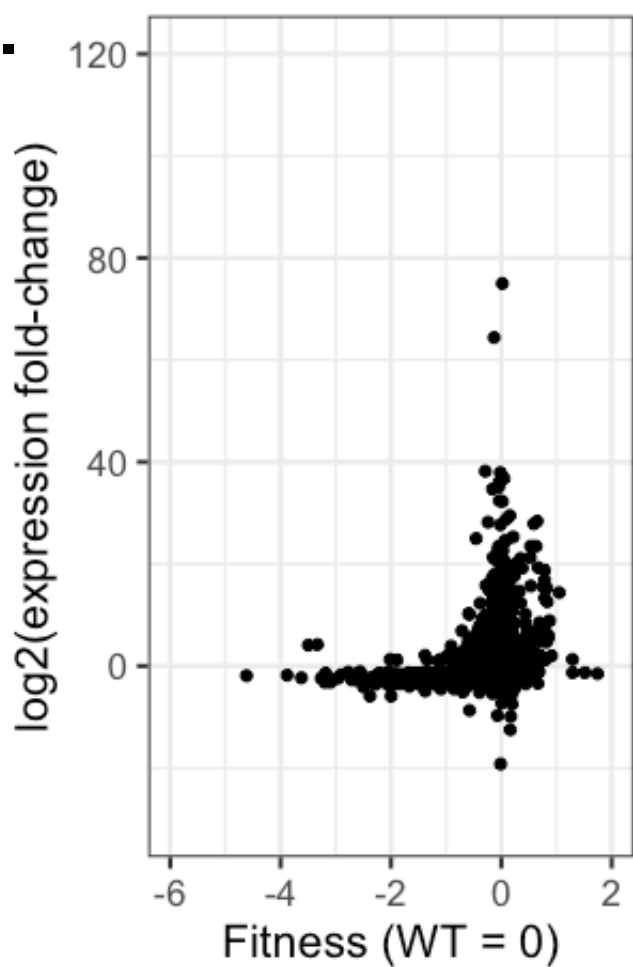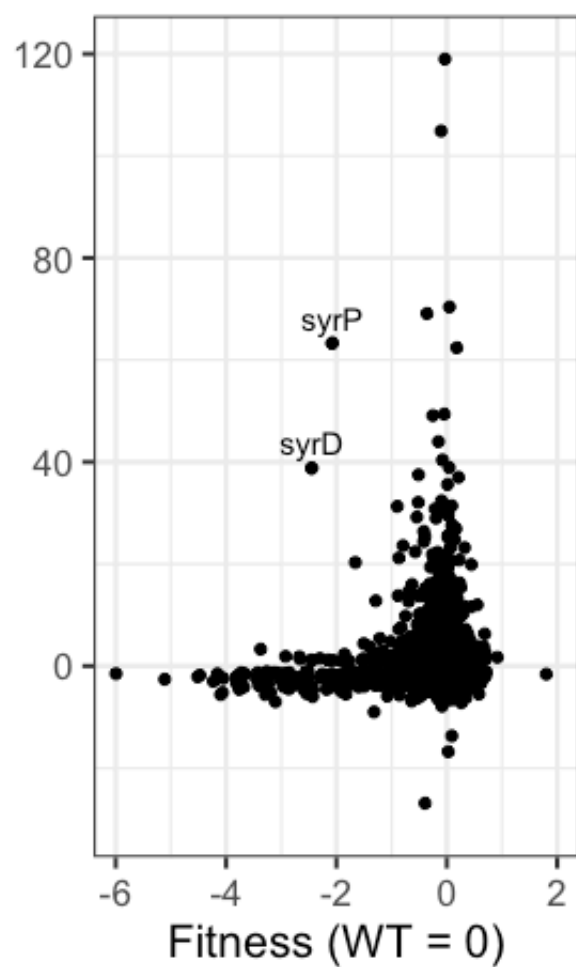

Source: http://biorxiv.org/content/10.1101/637496v1.full.pdf
